# Supplementary material for: Atomistic to Mesoscopic Modelling of Thermophysical Properties of Graphene-Reinforced Epoxy Nanocomposites
Source: MDPI journal article supplement (doi:10.3390/nano13131960), 2023-06-28
Supplement: s1 [file s1]

## Supplementary Materials

# Atomistic to Mesoscopic Modelling of Thermophysical Properties of Graphene-Reinforced Epoxy Nanocomposites

### Supplementary Note S1: Crosslinking mechanism

#### i. Atomistic model of epoxy

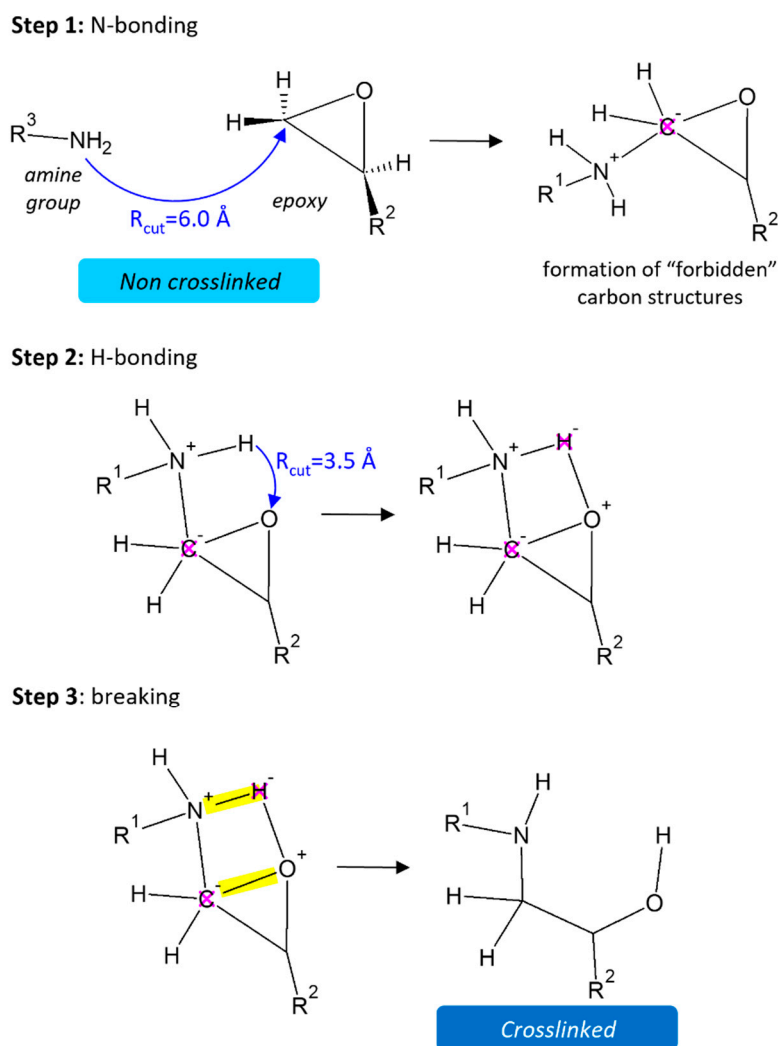

Figure S1. Cross-linking protocol for hardeners containing amine groups.

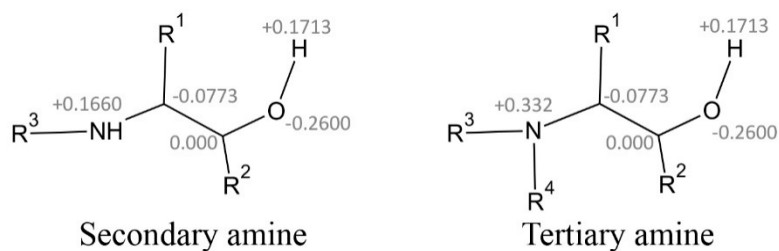

Figure S2. Charge update ( $\Delta q$ ) of atoms after cross-linking process (values in eV).

ii. Mesoscopic model of epoxy

| Polymer                  | Type of bead | Bead ID* | Description of bead                             |
|--------------------------|--------------|----------|-------------------------------------------------|
| <b>Epoxy resin (EPO)</b> | E            | 1        | Beads containing unreacted epoxy group in DGEBA |
|                          | G            | 2        | Oxyphenylene groups in DGEBA                    |
|                          | B            | 3        | Bead containing central dimethyl group in DGEBA |
|                          | Ad           | 4        | Primary amine group in DETA                     |
|                          | Ae           | 5        | Secondary amine group in DETA                   |
|                          | Ay           | 6        | Amine group in DICY                             |
|                          | Y            | 7        | Non-amine group in DICY                         |
|                          | E'           | 8        | Beads containing reacted epoxy group in DGEBA   |
|                          | Ad1          | 9        | Primary amine group in DETA – reacted once      |
|                          | Ad2          | 10       | Primary amine group in DETA – reacted twice     |
|                          | Ae1          | 11       | Secondary amine group in DETA – reacted         |
|                          | Ay1          | 12       | Amine group in DICY – reacted once              |
|                          | Ay2          | 13       | Amine group in DICY – reacted twice             |

Table S1. List of beads for coarse-grained (CG) model of epoxy resin.

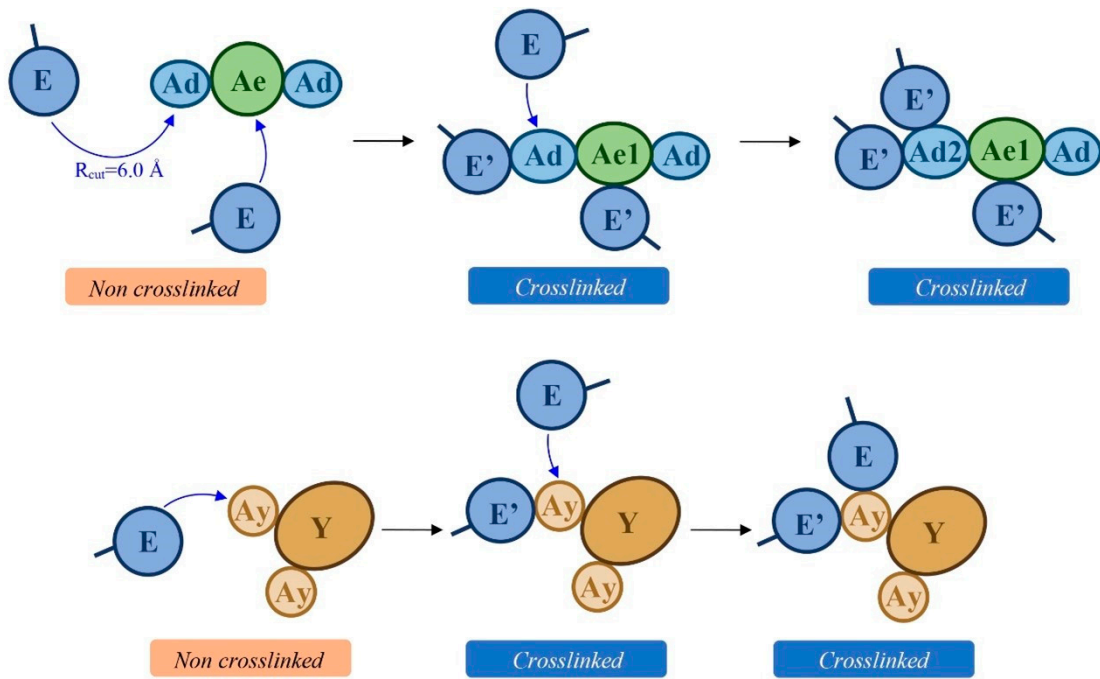

Figure S3. Cross-linking mechanism of CG beads.

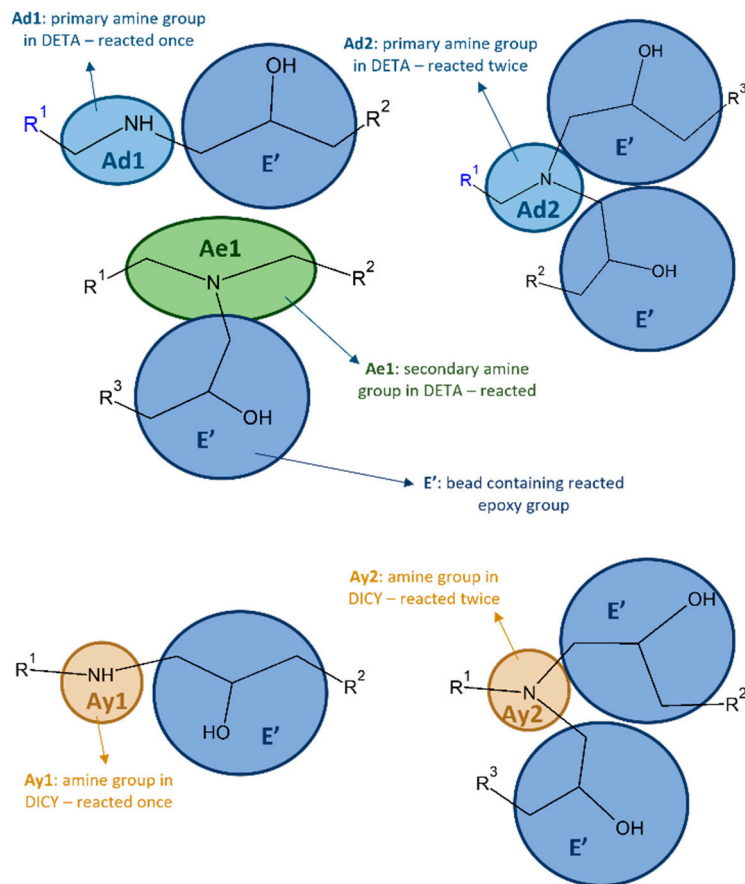

Figure S4. Mapping scheme for cross-linked groups of epoxy resin.

## Supplementary Note S2: Mesoscopic model of graphene

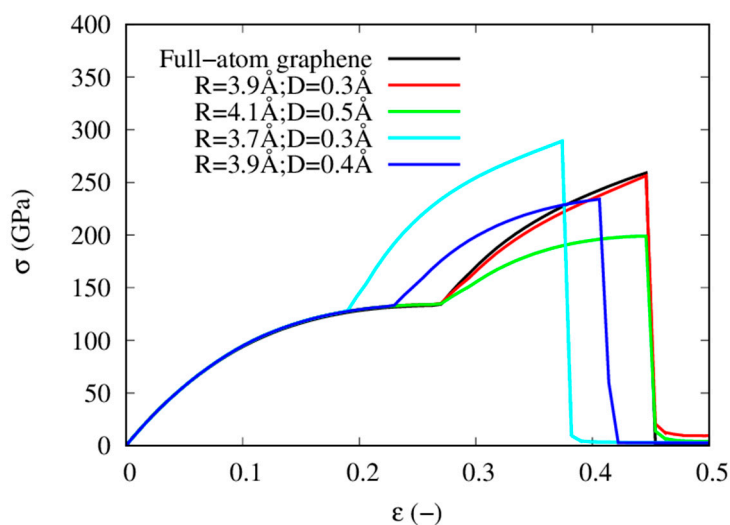

Figure S5. Optimization of the values of  $R$  and  $D$  for the TersoffCG potential.

| Parameter                    | Tersoff potential | TersoffCG potential |
|------------------------------|-------------------|---------------------|
| $m$                          | 3                 | 3                   |
| $\gamma$                     | 1                 | 1                   |
| $\lambda_3(\text{\AA}^{-1})$ | 0                 | 0                   |
| $c$                          | 38049             | 38049               |
| $d$                          | 4.3484            | 4.3484              |
| $\cos \theta_0$              | -0.57058          | -0.57058            |
| $n$                          | 0.72751           | 0.72751             |
| $\beta$                      | 0.00000015724     | 0.00000015724       |
| $\lambda_2(\text{\AA}^{-1})$ | 2.2119            | 1.10595             |
| $B(\text{kcal/mol})$         | 7995.2            | 31980.8             |
| $R(\text{\AA})$              | 1.95              | 3.90                |
| $D(\text{\AA})$              | 0.15              | 0.30                |
| $\lambda_1(\text{\AA}^{-1})$ | 3.4879            | 1.74395             |
| $A(\text{kcal/mol})$         | 32137.67024       | 128550.68096        |

Table S2. Parameters of Tersoff and TersoffCG potentials for graphene.

## Supplementary Note S3: Epoxy resin CG force field (EPO-CGff)

| Bond     | Angle          |                |               |                 |
|----------|----------------|----------------|---------------|-----------------|
| E – G    | E – G – B      | E' – Ae1 – Ad1 | E' – G – B    | Ad – Ae1 – Ad2  |
| G – B    | G – B – G      | E' – Ae1 – Ad2 | Ay2 – Y – Ay  | Ad1 – Ae – Ad   |
| Ad – Ae  | AY – Y – Ay    | G – E' – Ad1   | Ay1 – Y – Ay  | Ad2 – Ae1 – Ad2 |
| Ay – Y   | Ad – Ae – Ad   | G – E' – Ad2   | Ay1 – Y – Ay1 | Ad – Ae – Ad2   |
| E' – Ad1 | E' – Ad1 – Ae  | G – E' – Ae1   | Ay1 – Y – Ay2 | Ad1 – Ae1 – Ad2 |
| E' – Ad2 | E' – Ad1 – Ae1 | E' – Ay1 – Y   | Ay2 – Y – Ay2 | Ad2 – Ae – Ad1  |
| E' – Ae1 | E' – Ad2 – Ae  | E' – Ay2 – Y   | E' – Ad2 – E' | Ad – Ae1 – Ad1  |
| E' – Ay1 | E' – Ad2 – Ae1 | G – E' – Ay1   | E' – Ay2 – E' | Ad2 – Ae – Ad2  |
| E' – Ay2 | E' – Ae1 – Ad  | G – E' – Ay2   | Ad – Ae1 – Ad |                 |

Table S3. List of potentials in the developed EPO-CGff force field for bonded interactions (bonds and angles).

| Non-bonded |          |          |           |           |
|------------|----------|----------|-----------|-----------|
| E ... E    | E ... Y  | G ... Y  | Ad ... Ad | Ae ... Y  |
| E ... G    | G ... G  | B ... B  | Ad ... Ae | Ay ... Ay |
| E ... B    | G ... B  | B ... Ad | Ad ... Ay | Ay ... Y  |
| E ... Ad   | G ... Ad | B ... Ae | Ad ... Y  | Y ... Y   |
| E ... Ae   | G ... Ae | B ... Ay | Ae ... Ae |           |
| E ... Ay   | G ... Ay | B ... Y  | Ae ... Ay |           |

Table S4. List of potentials in the developed EPO-CGff force field for non-bonded interactions.

### i. Bond potentials

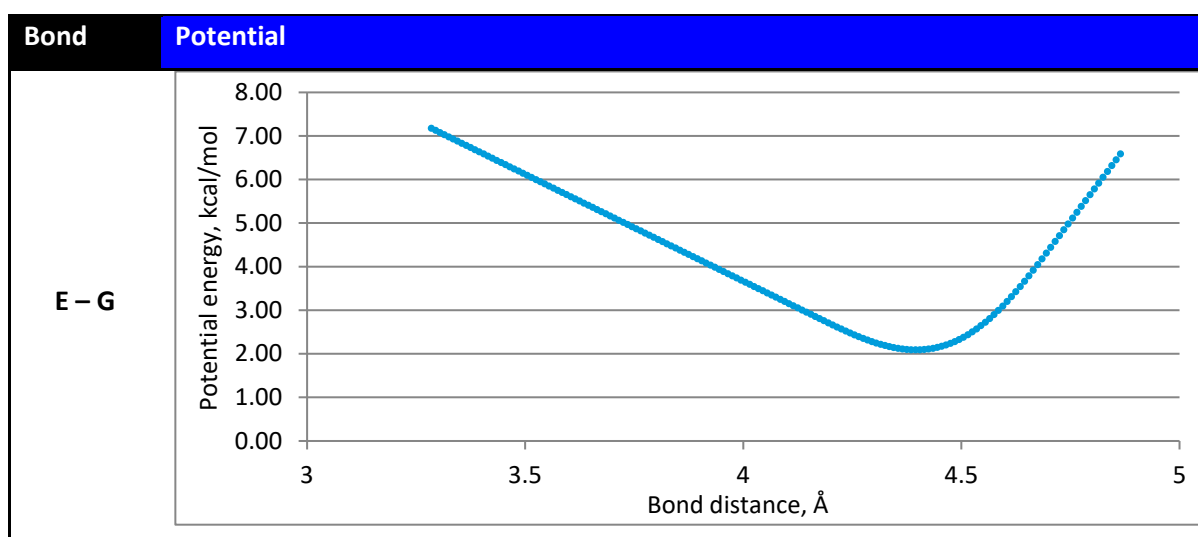

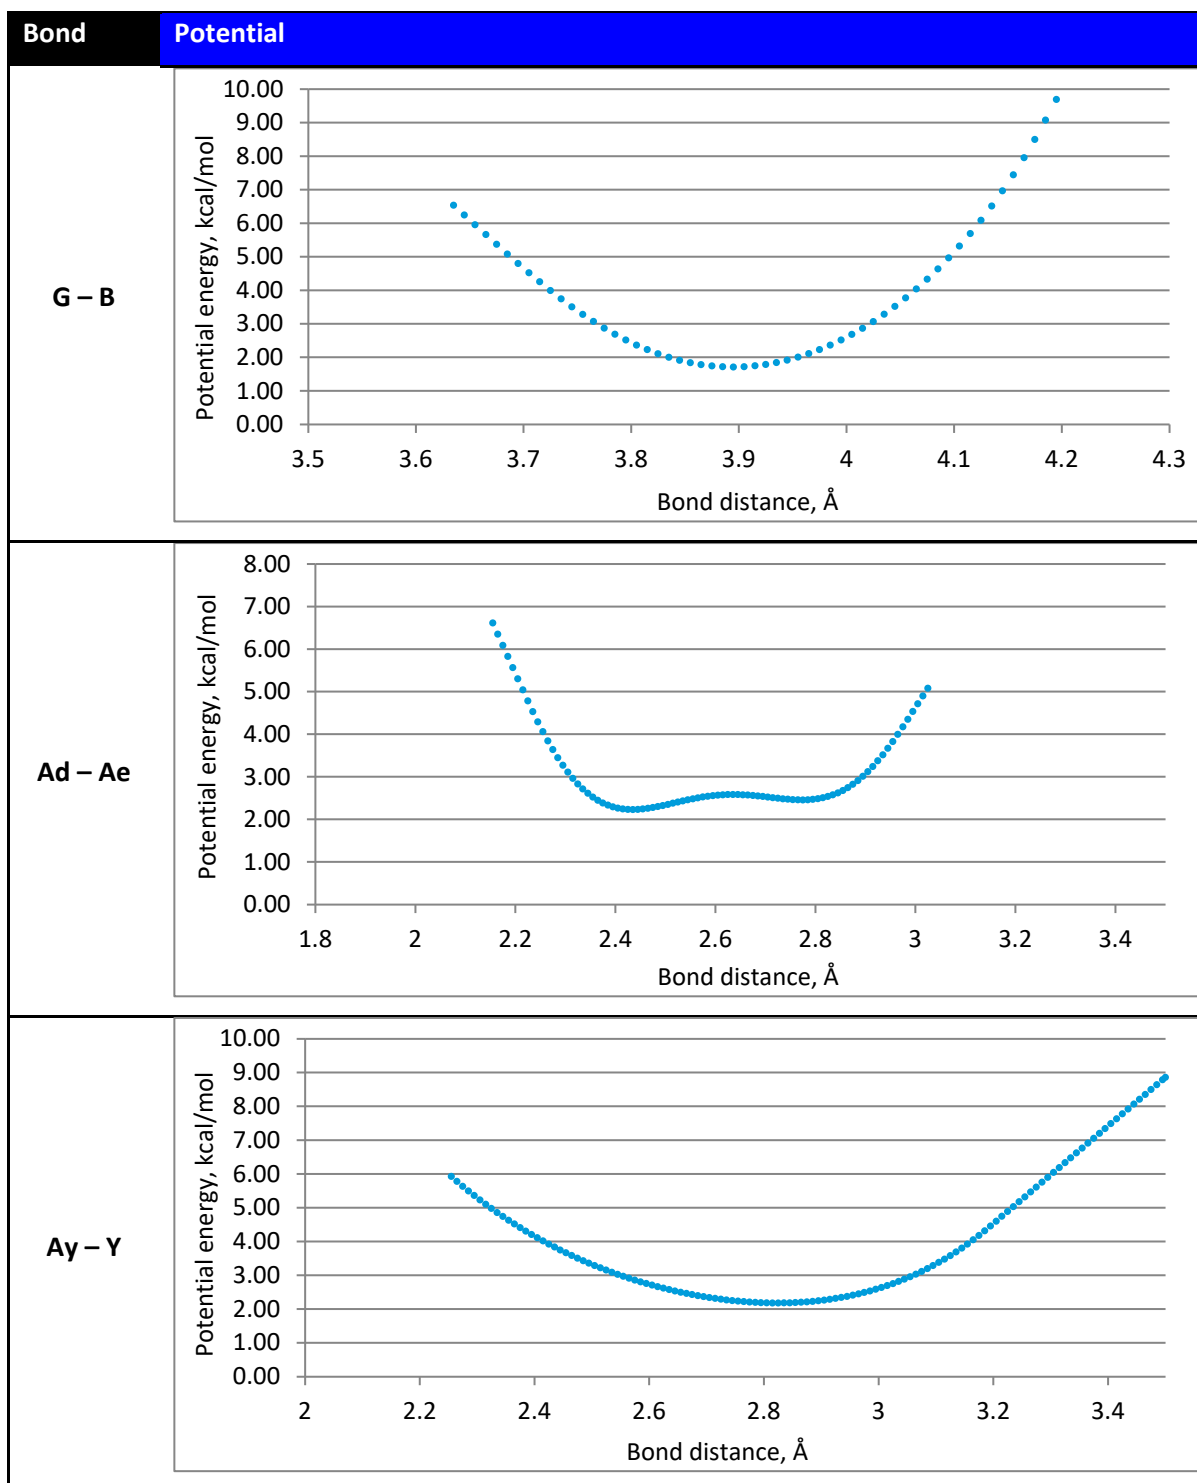

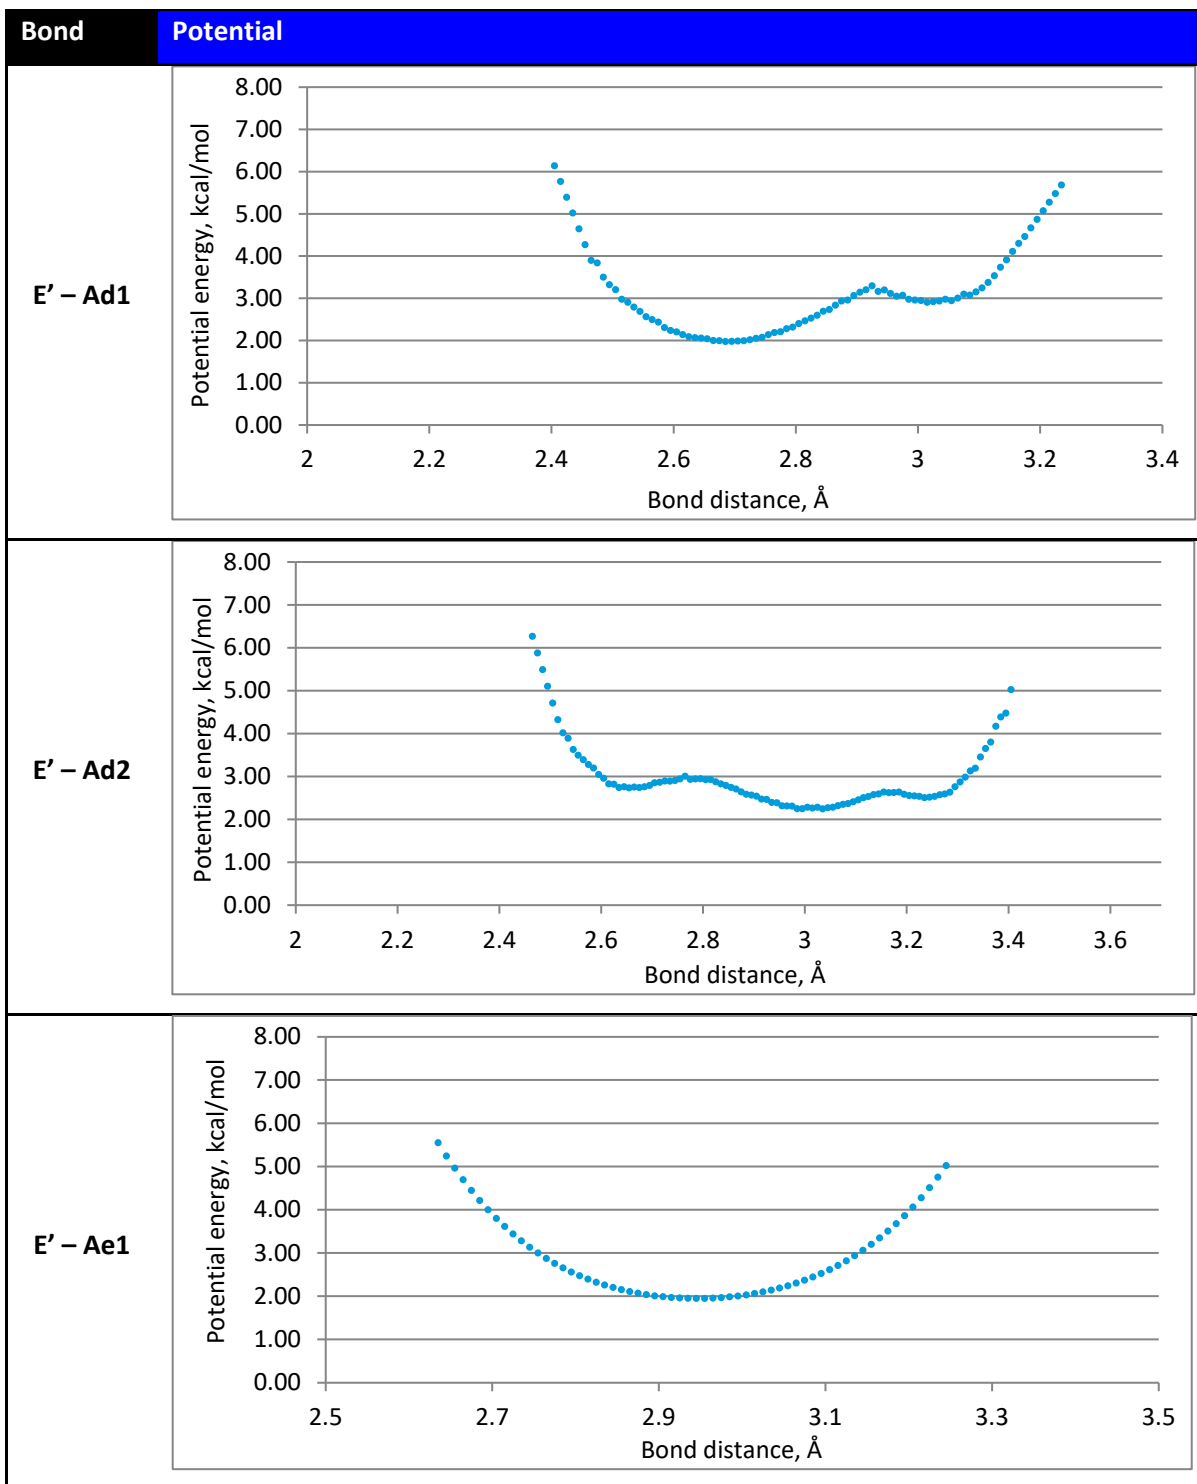

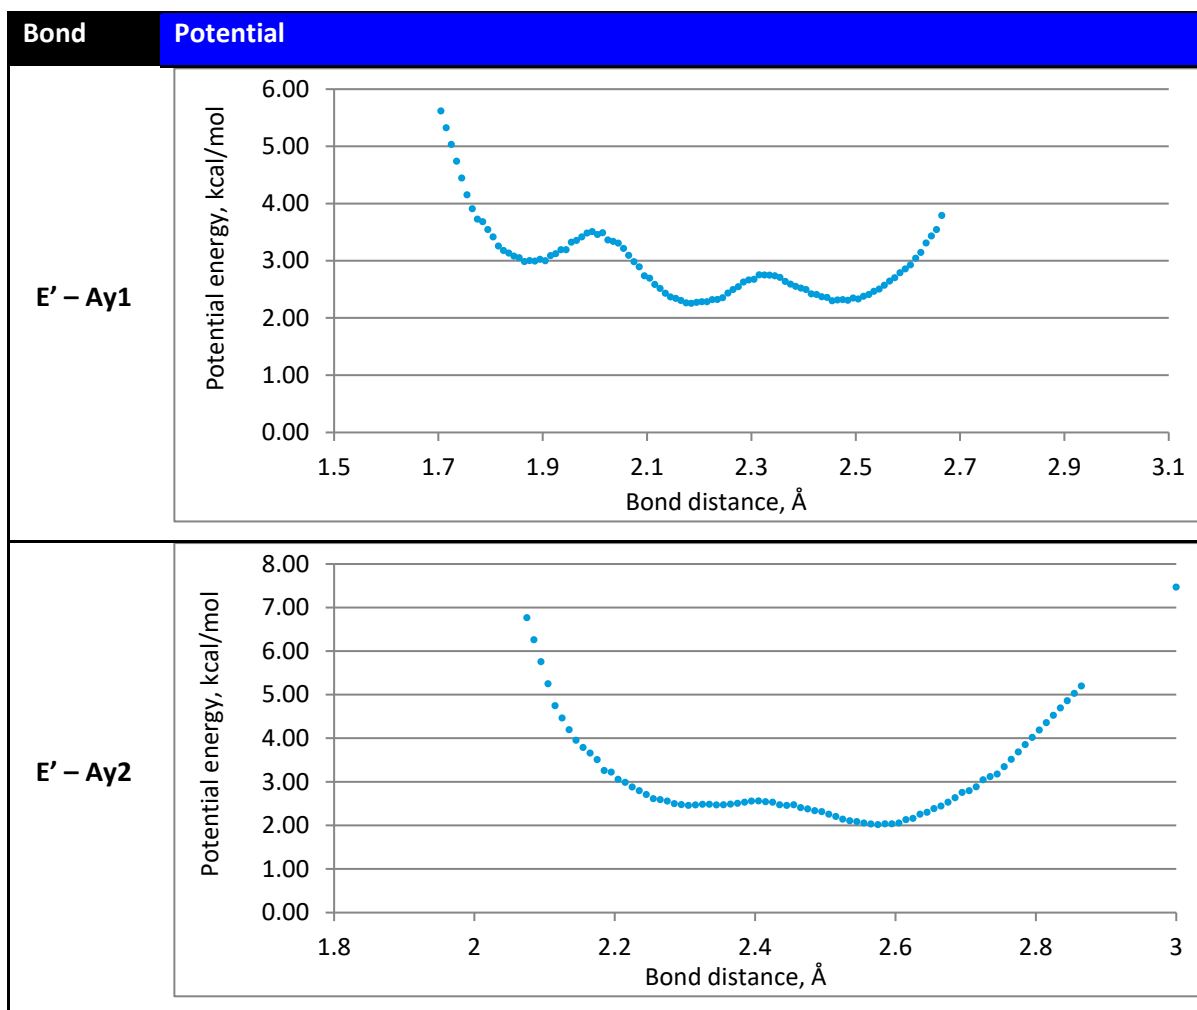

ii. Angle Potentials

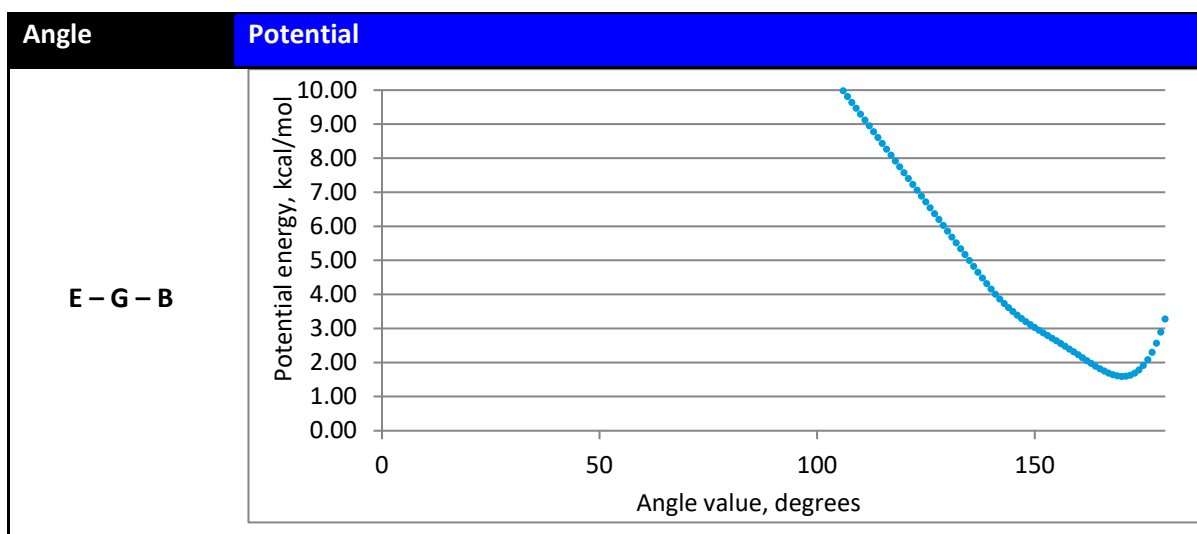



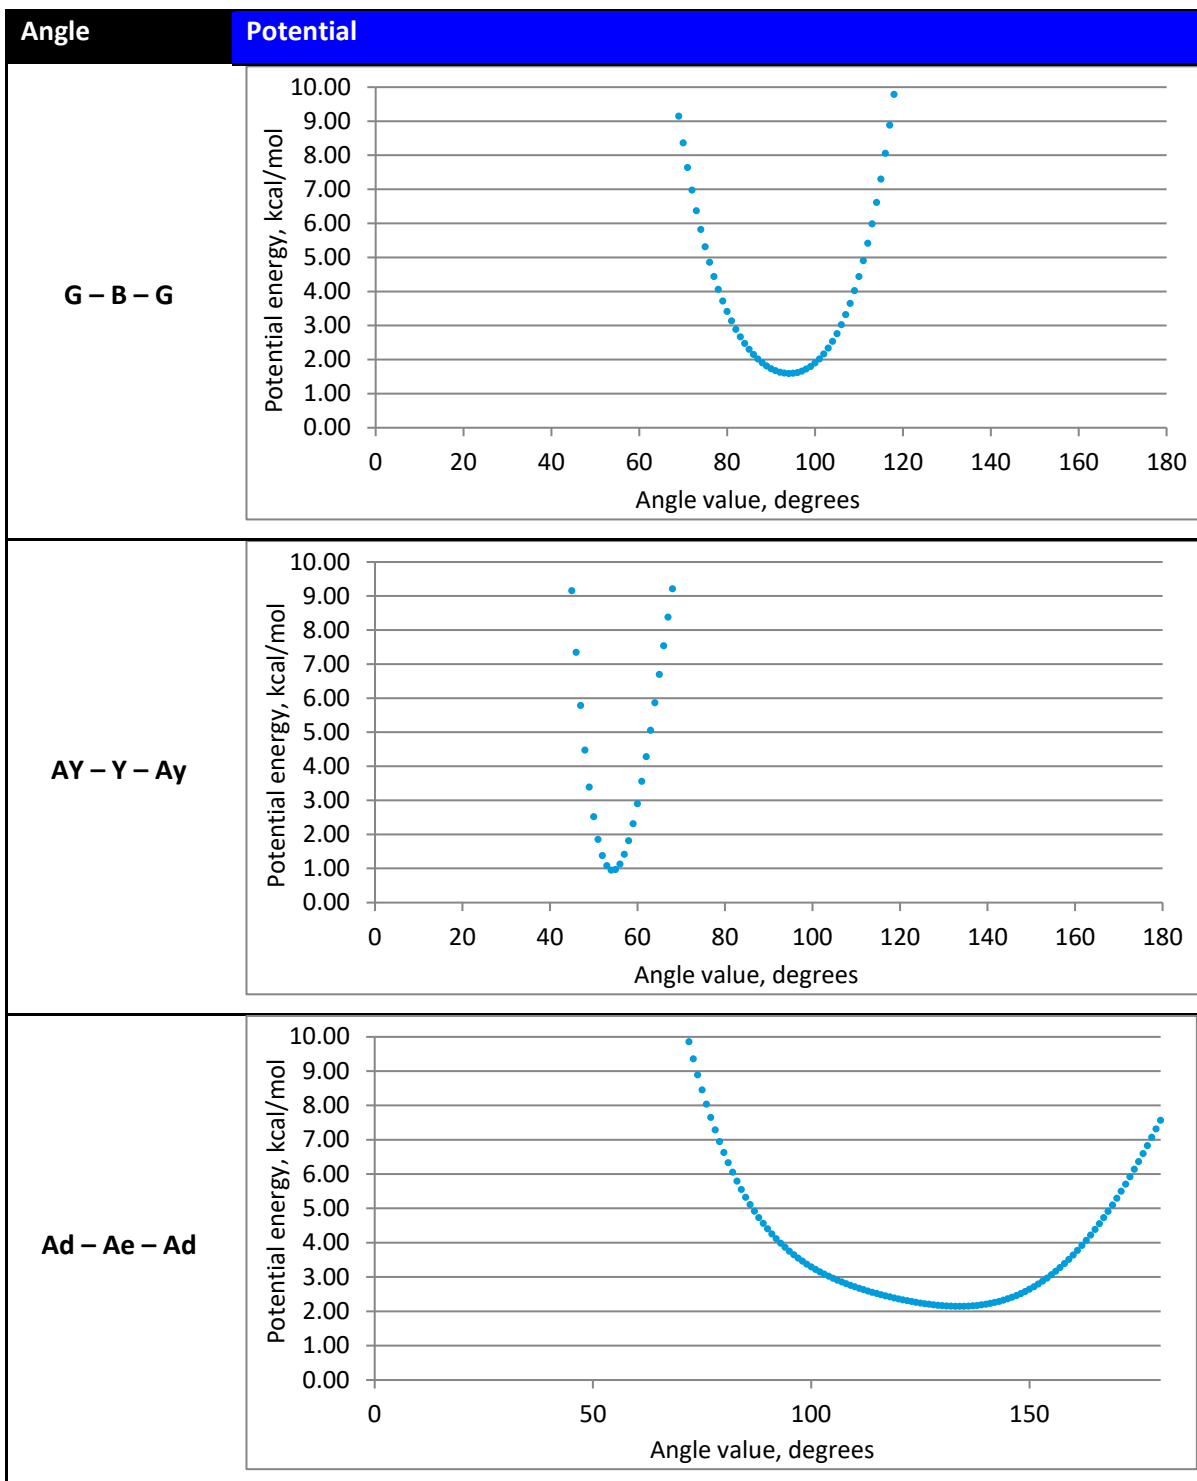

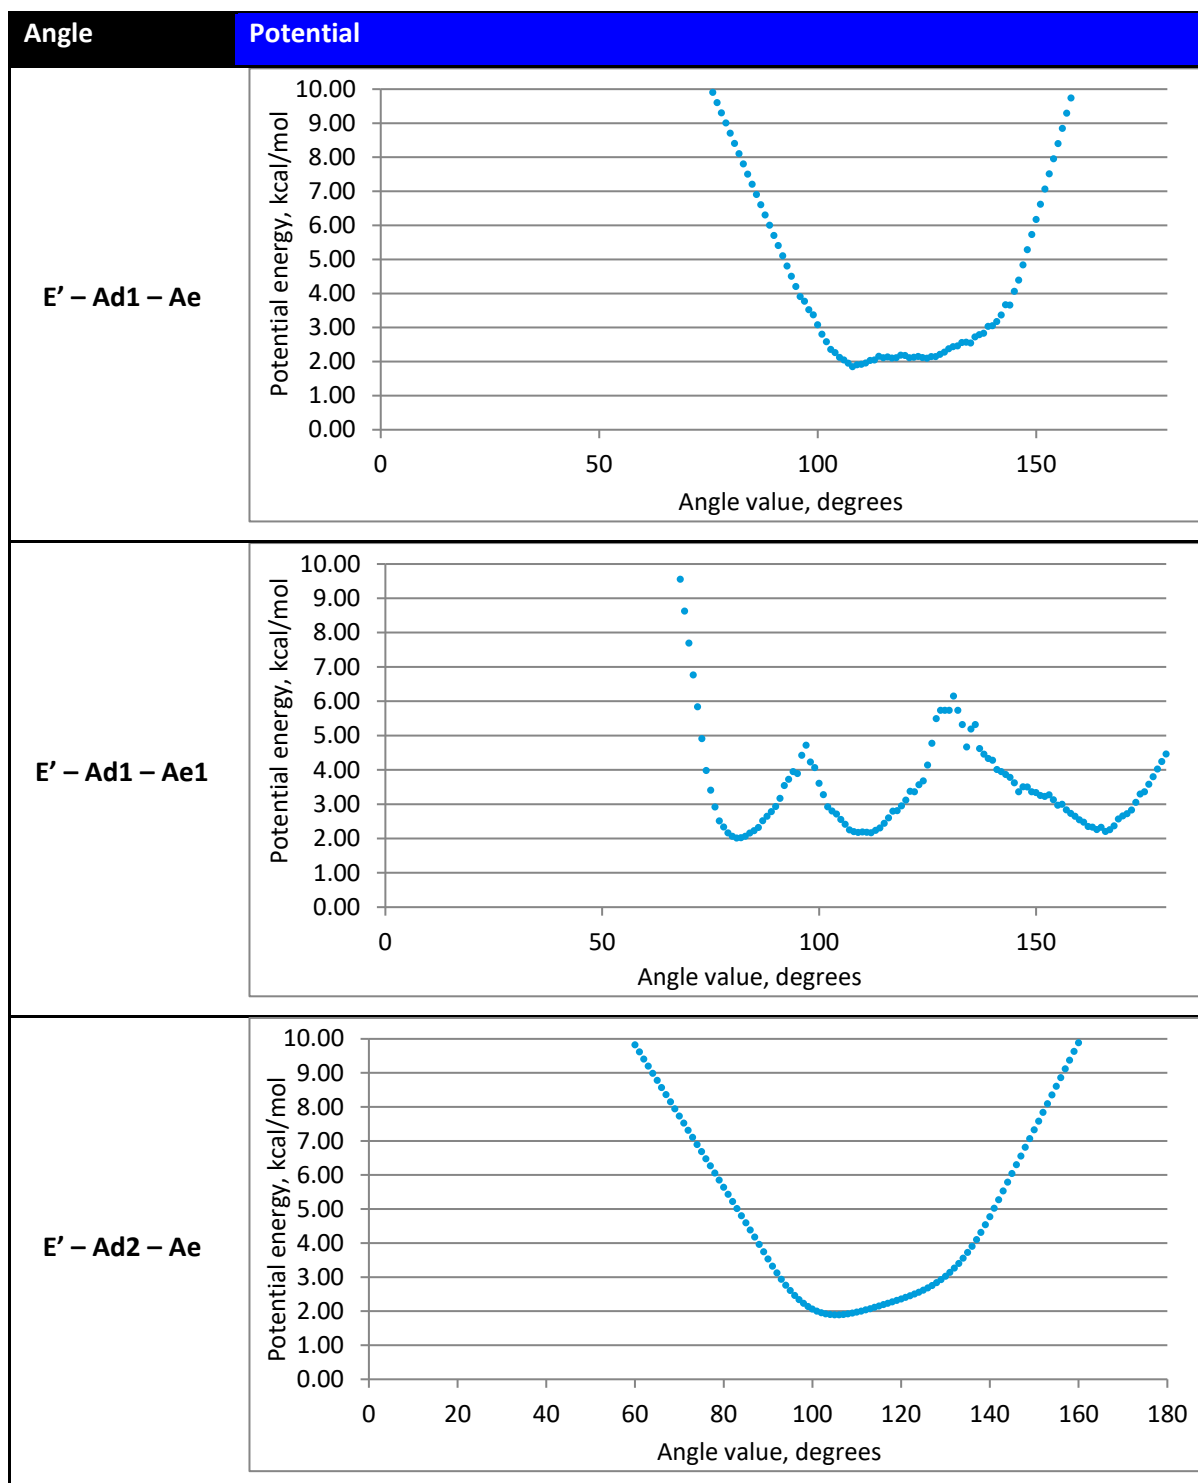

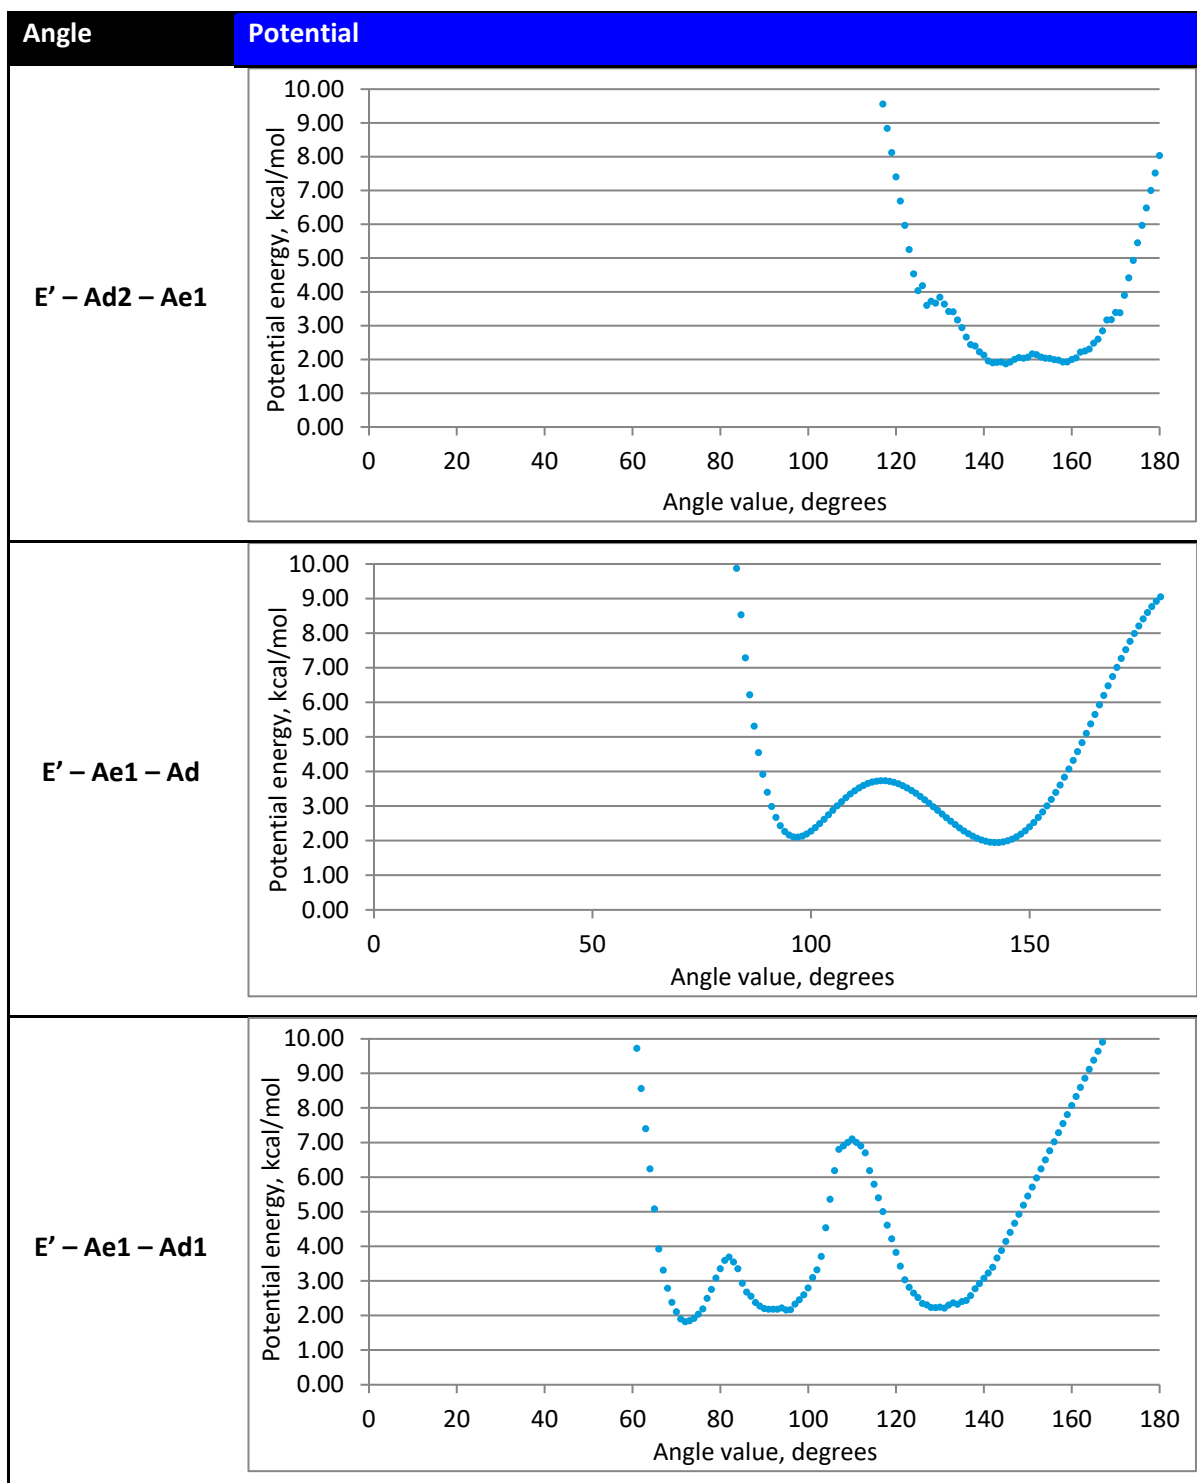

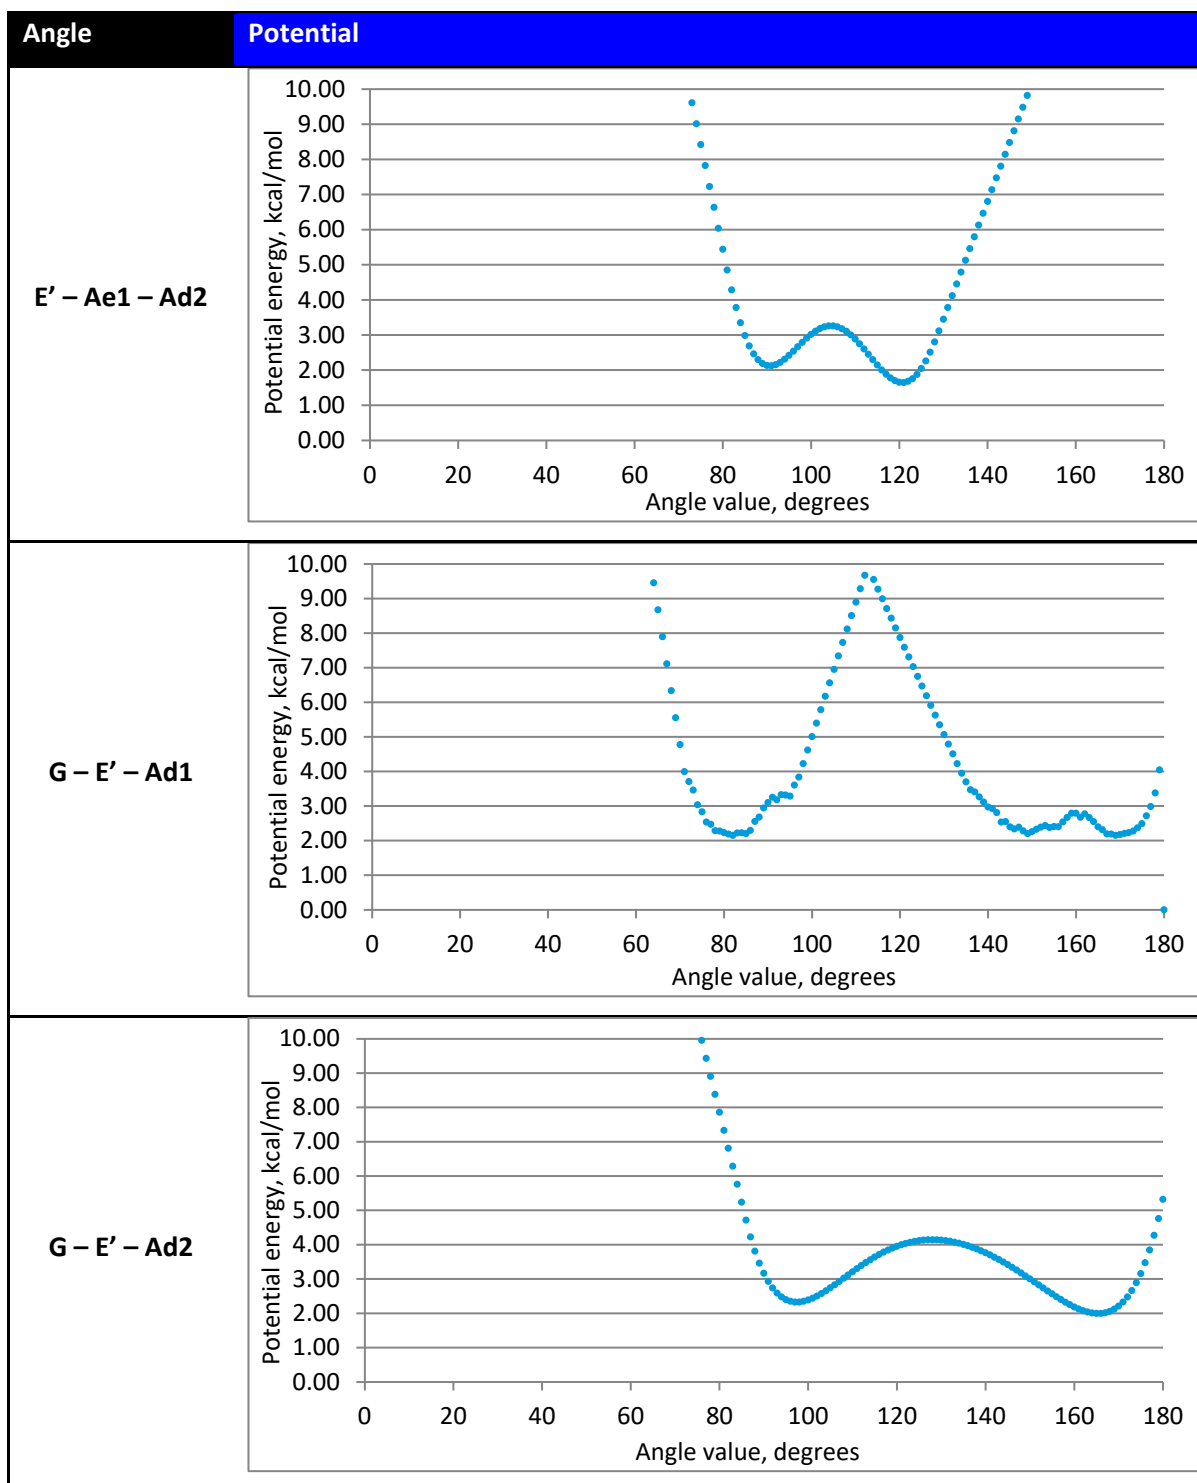

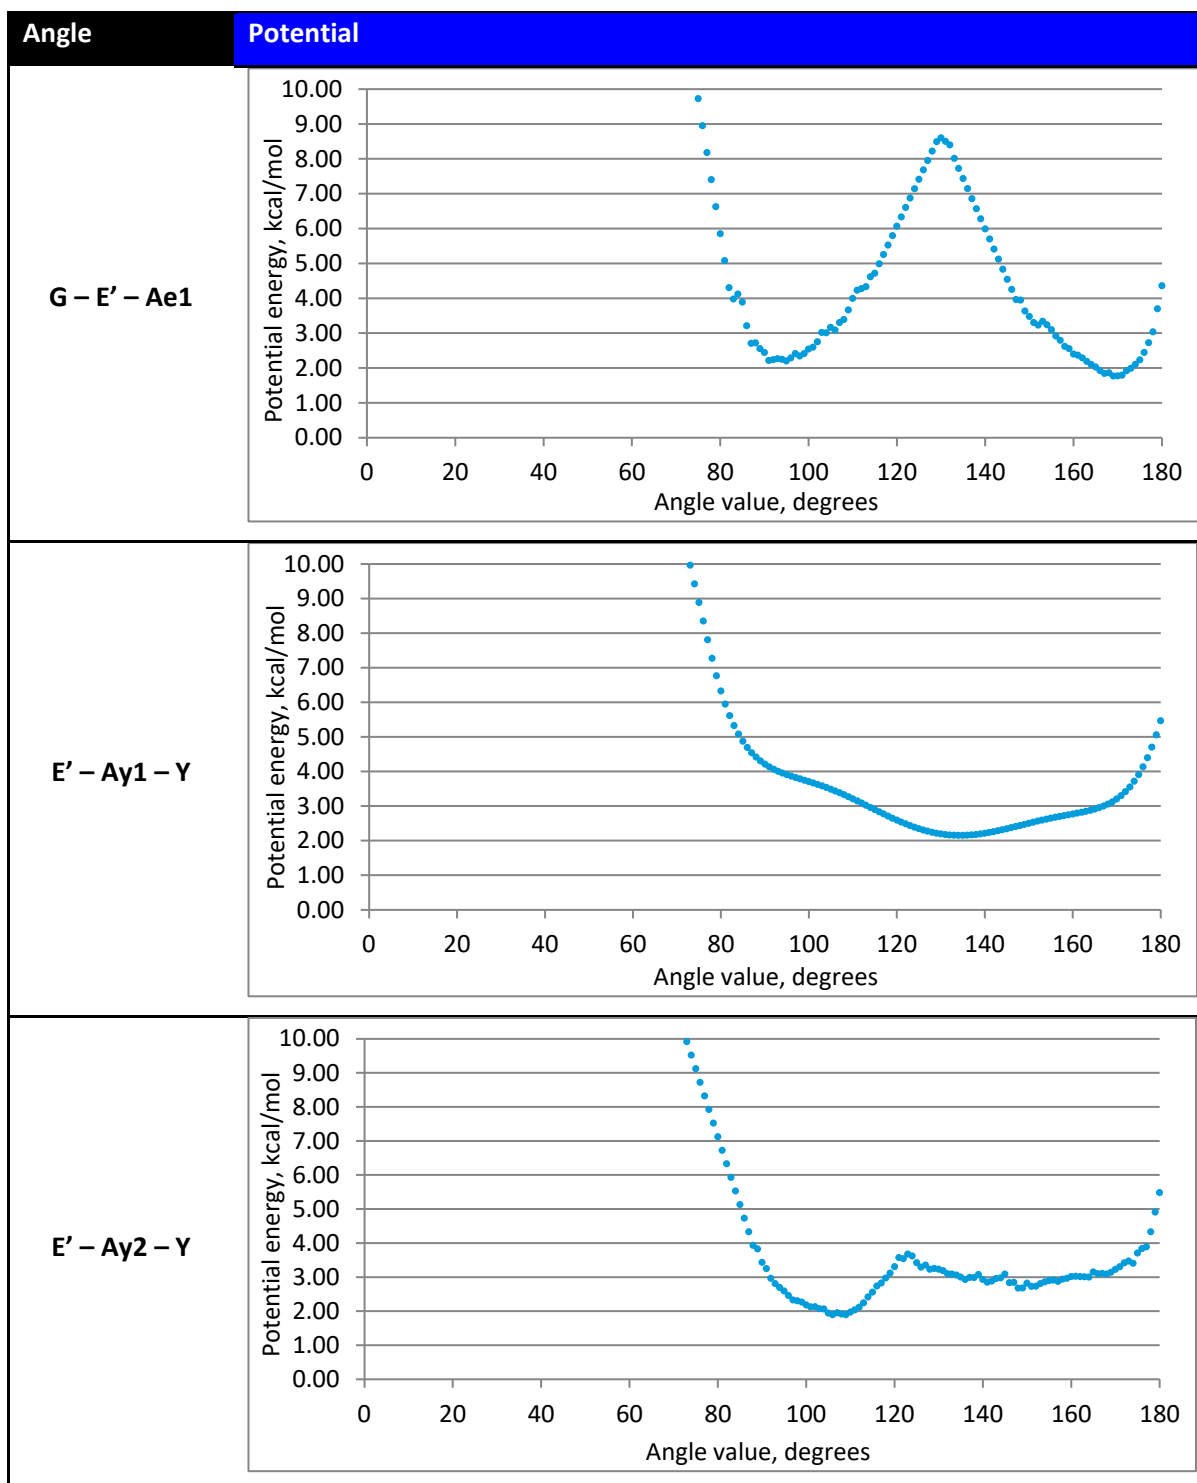

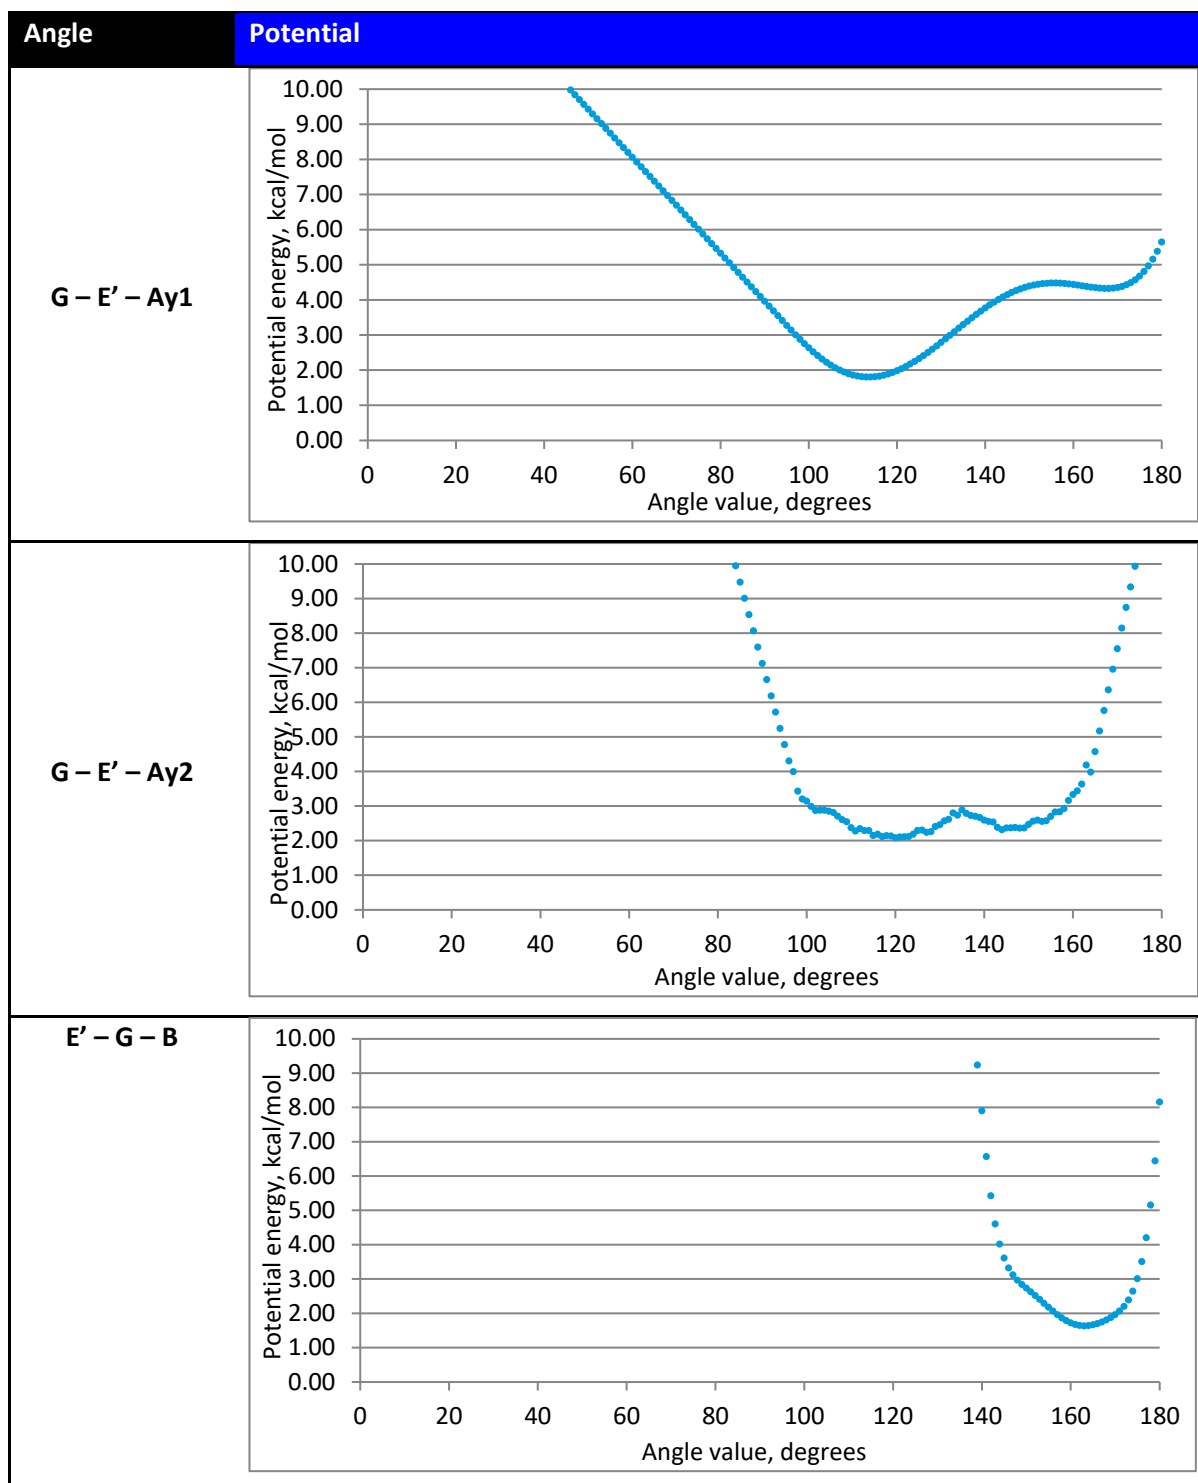

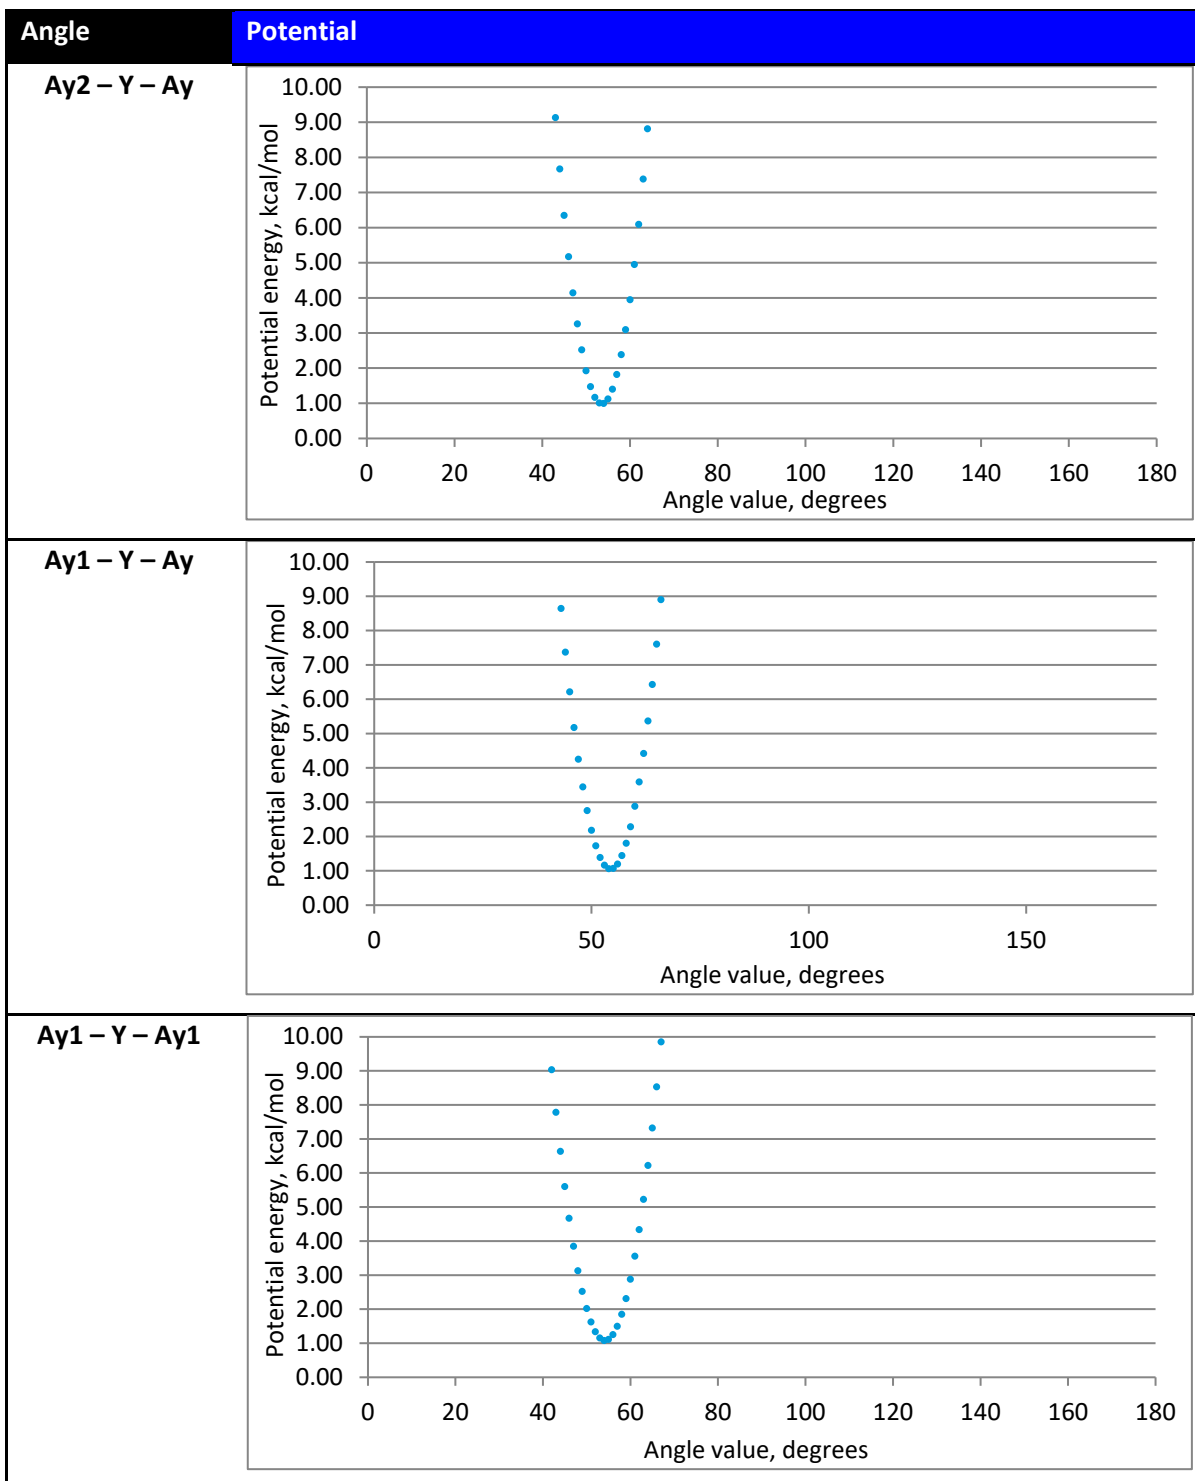

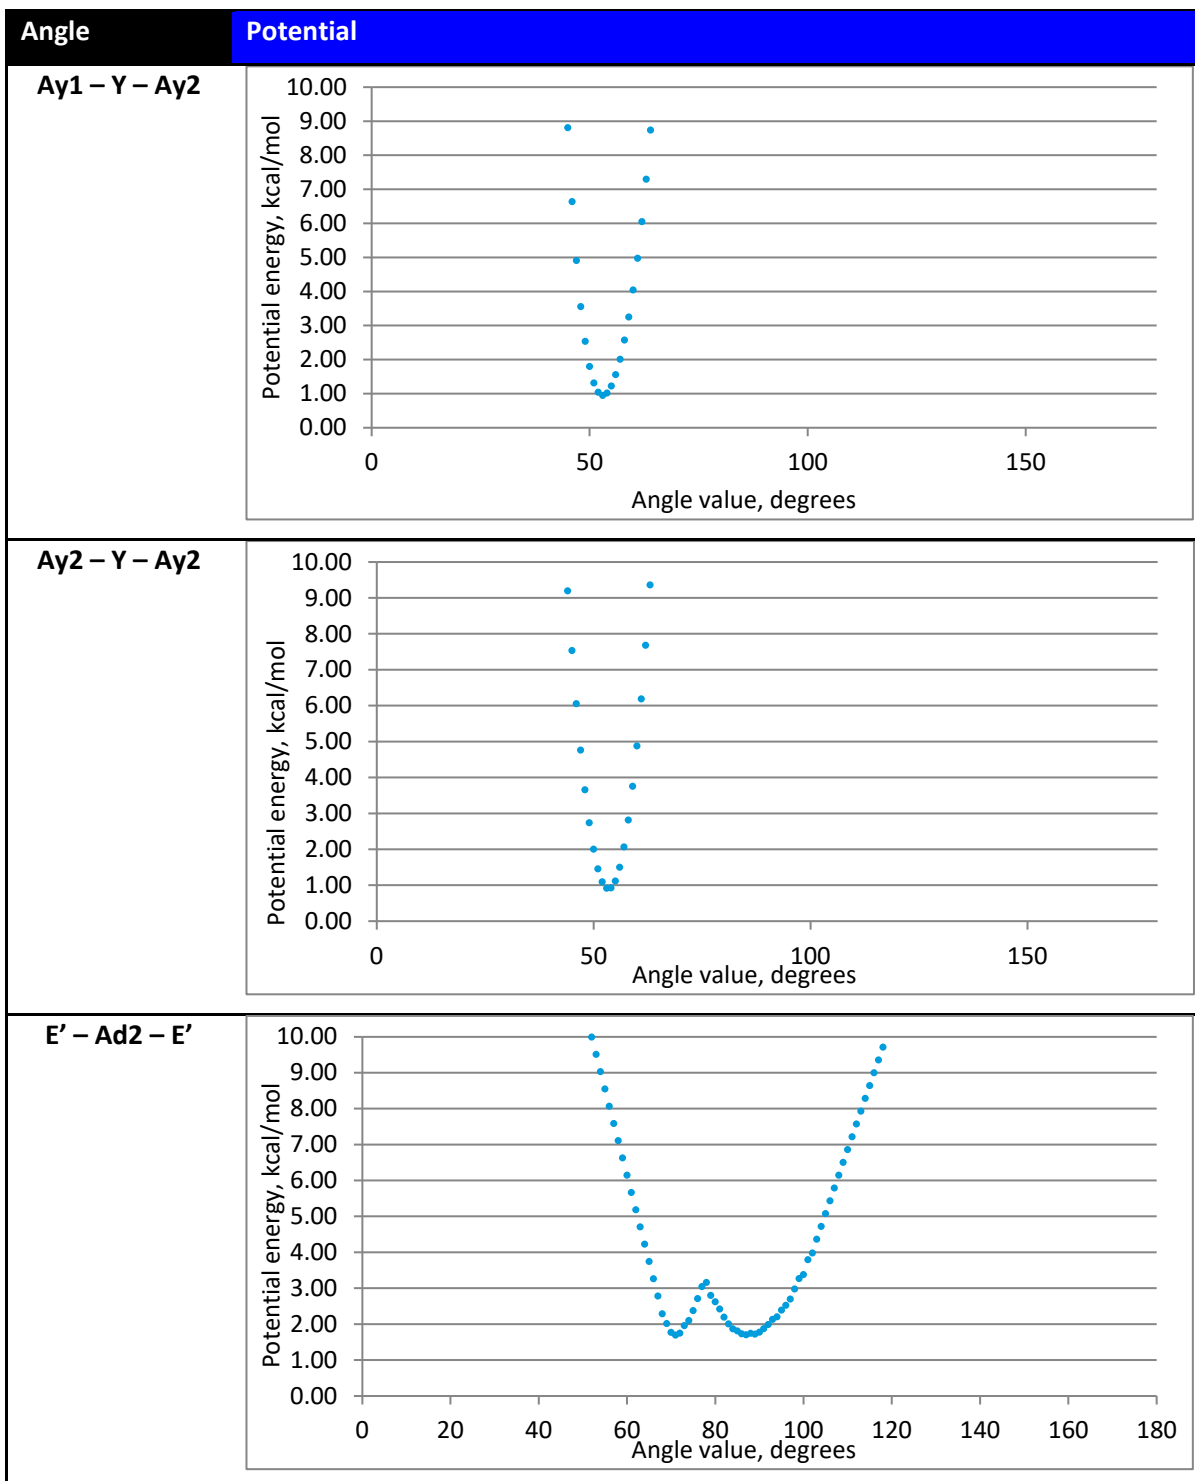



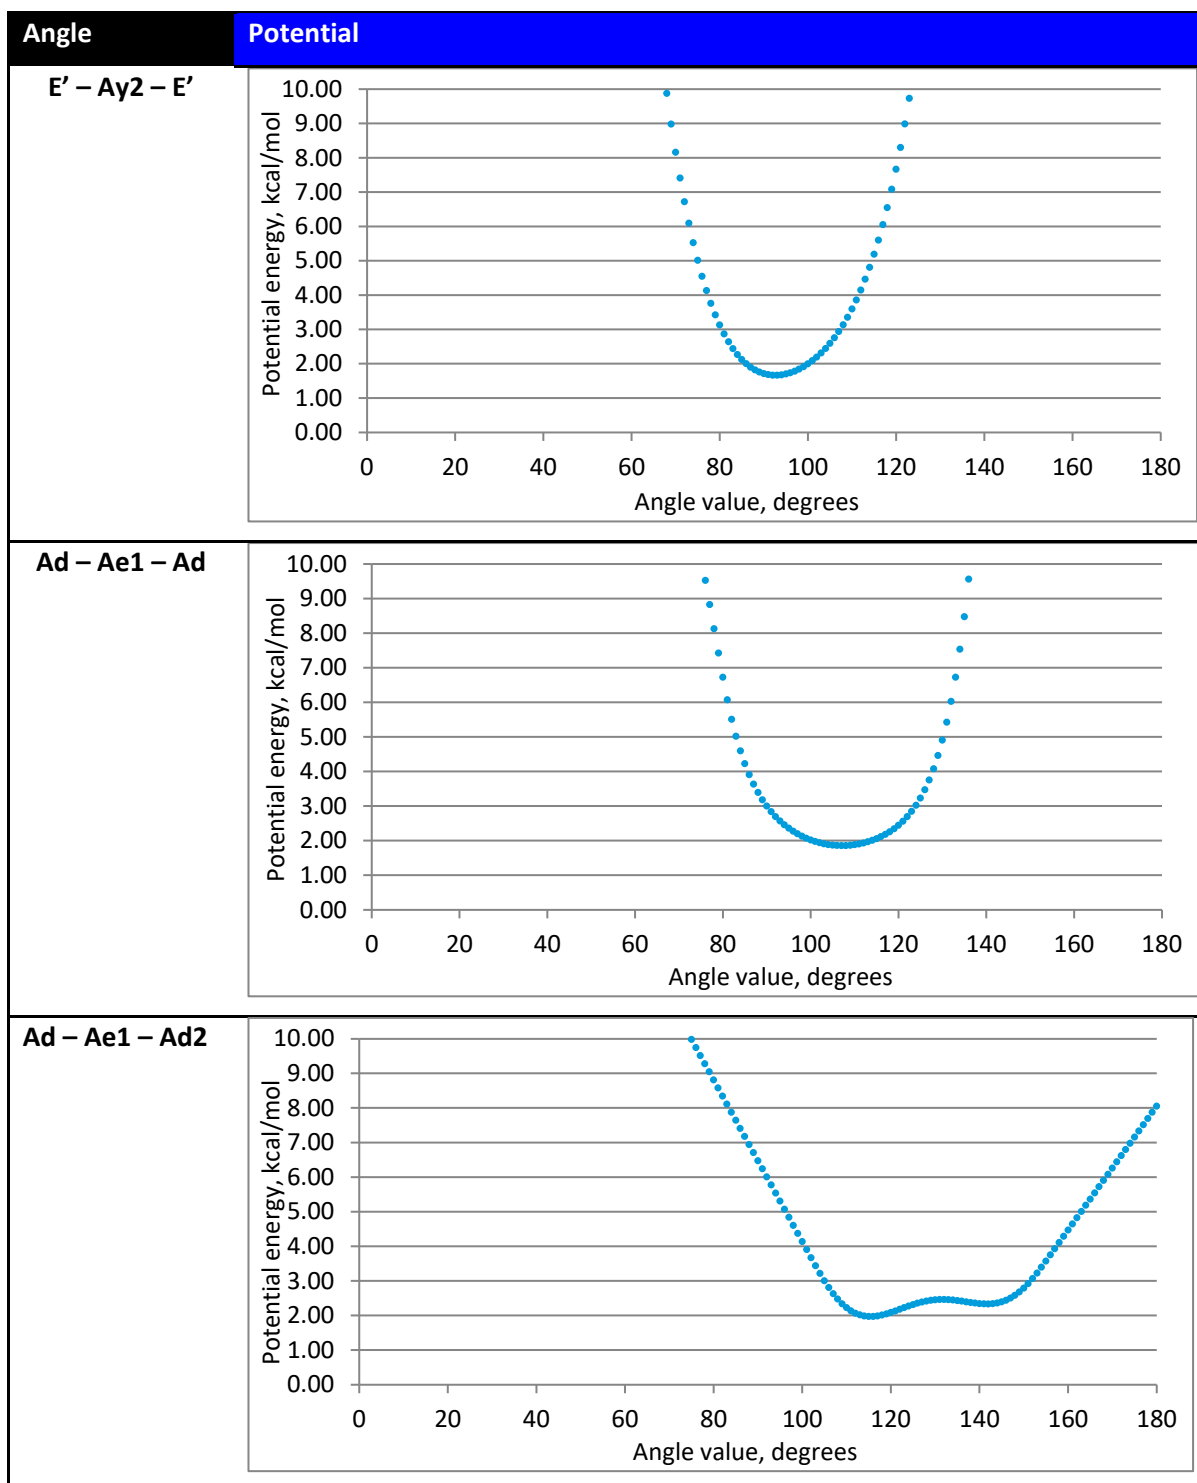

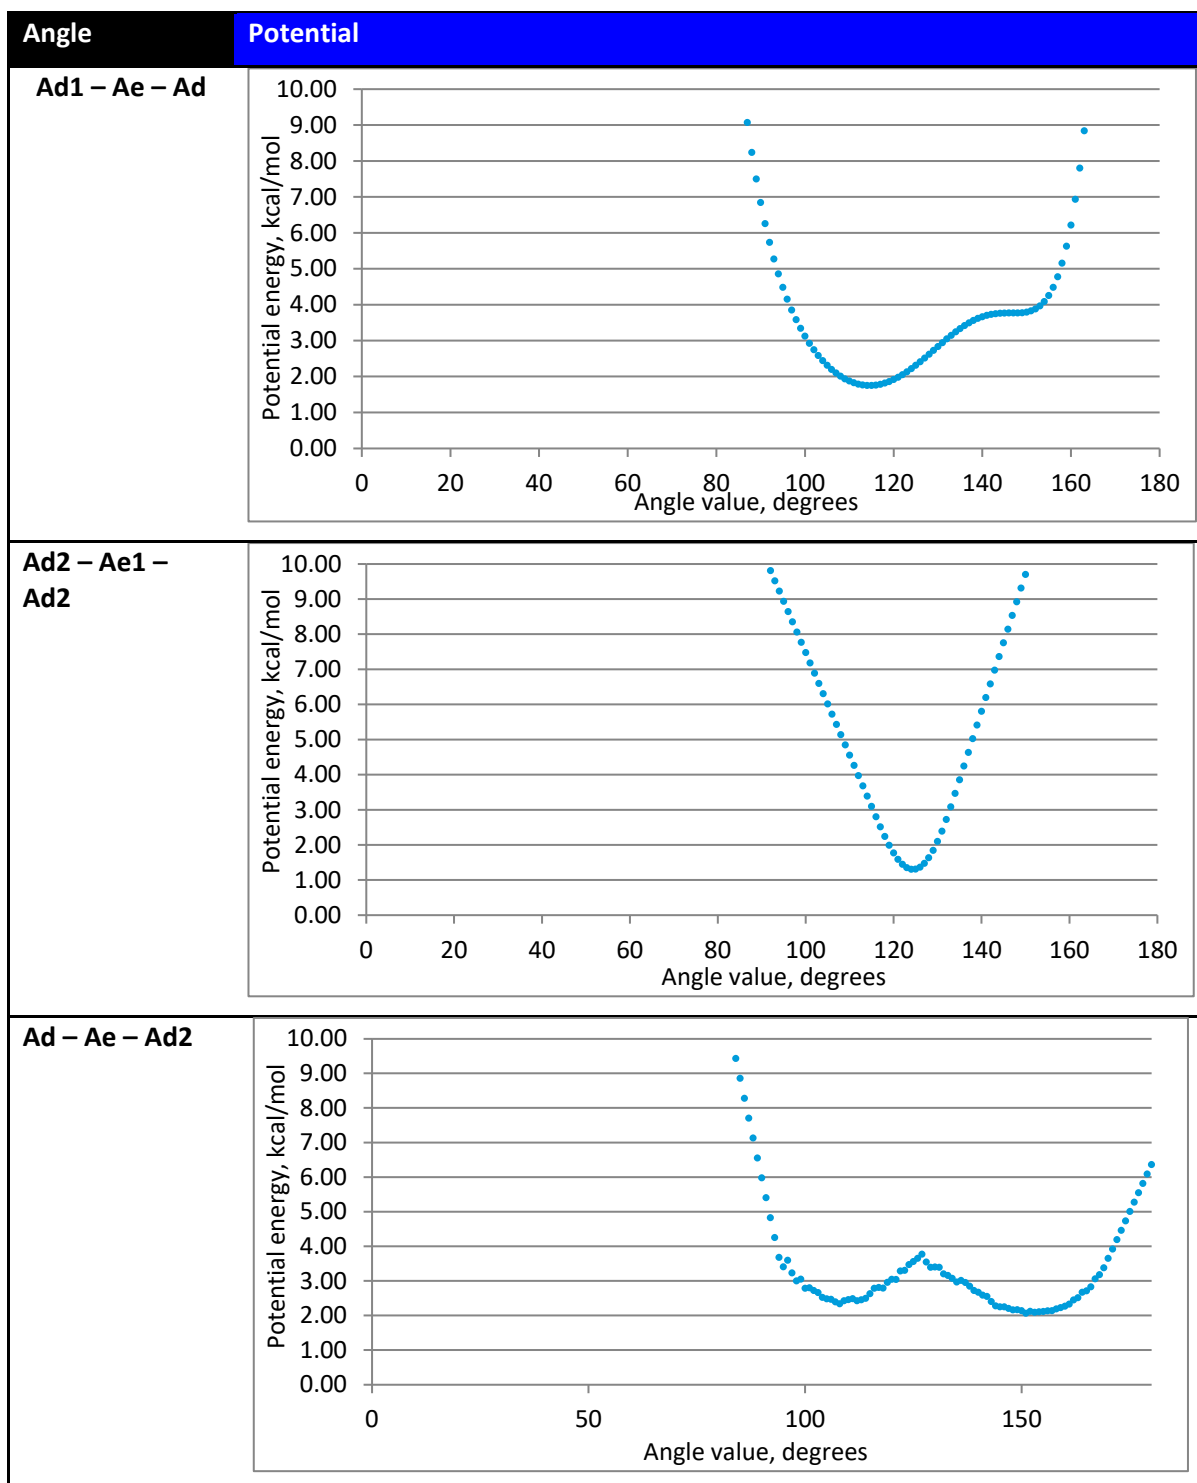

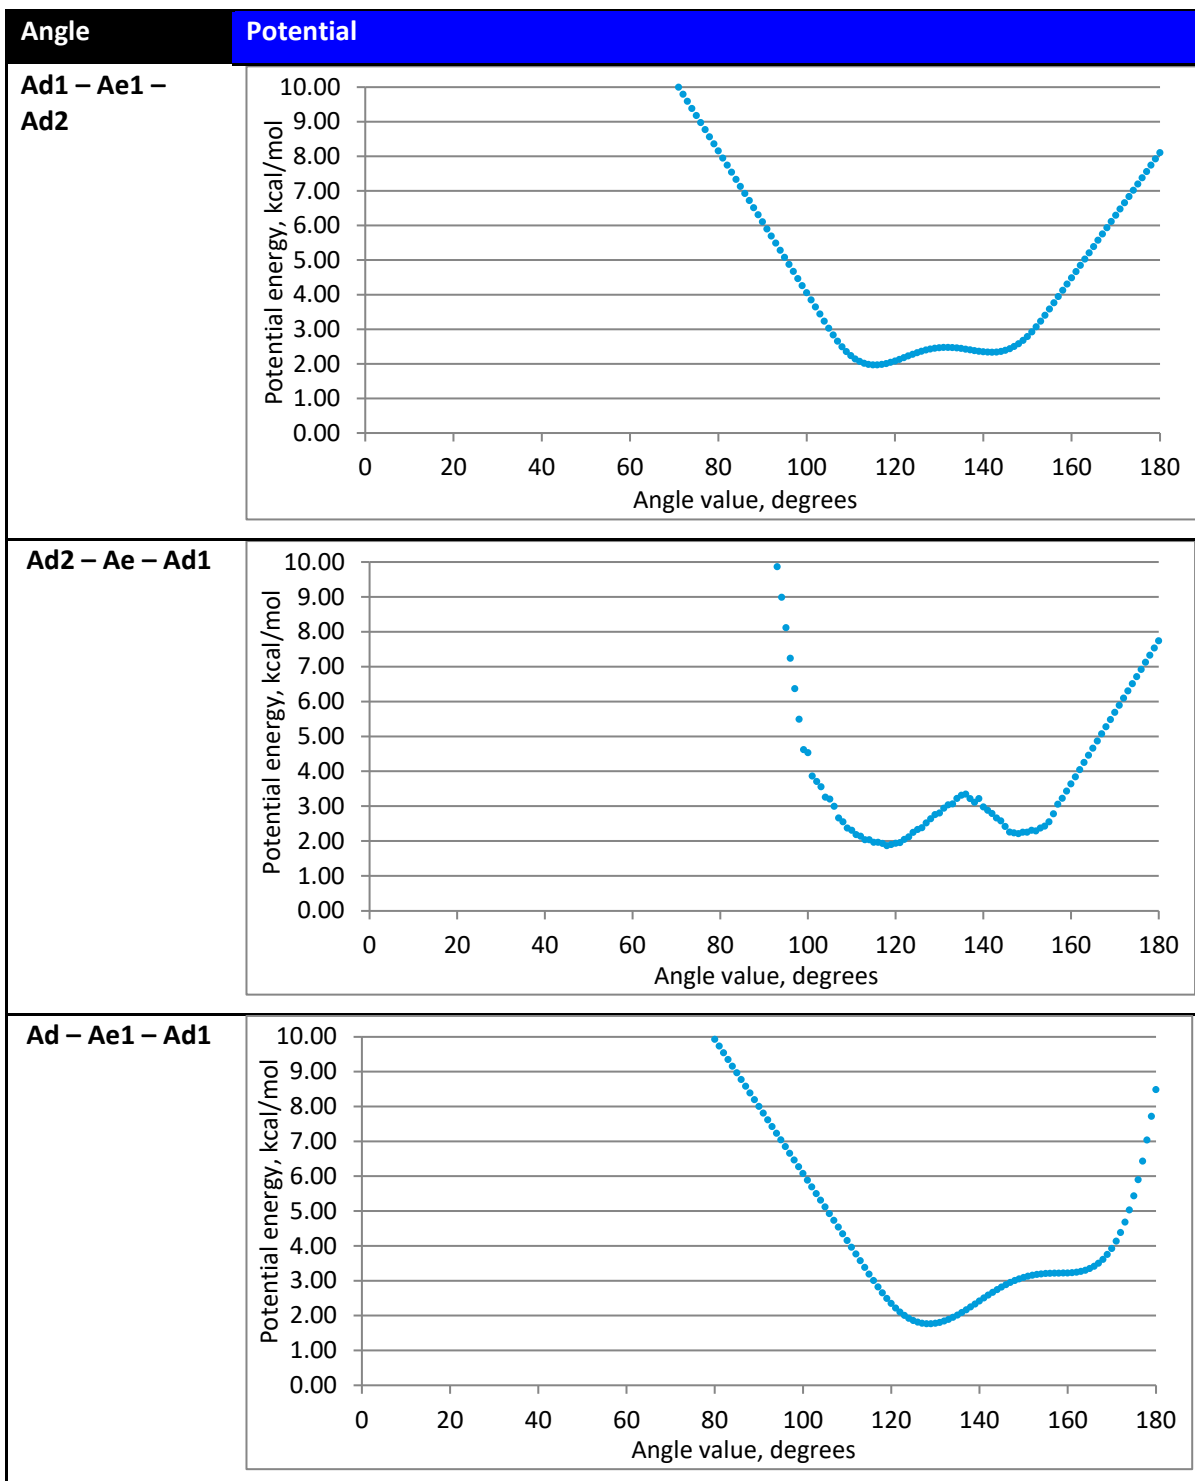

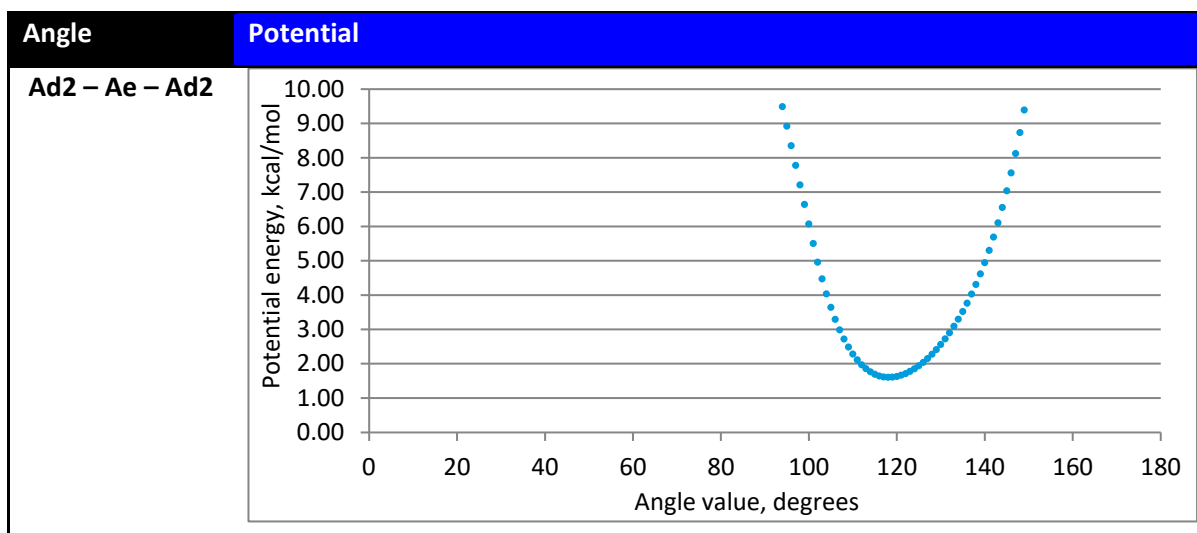

iii. *Non-bonded potentials*

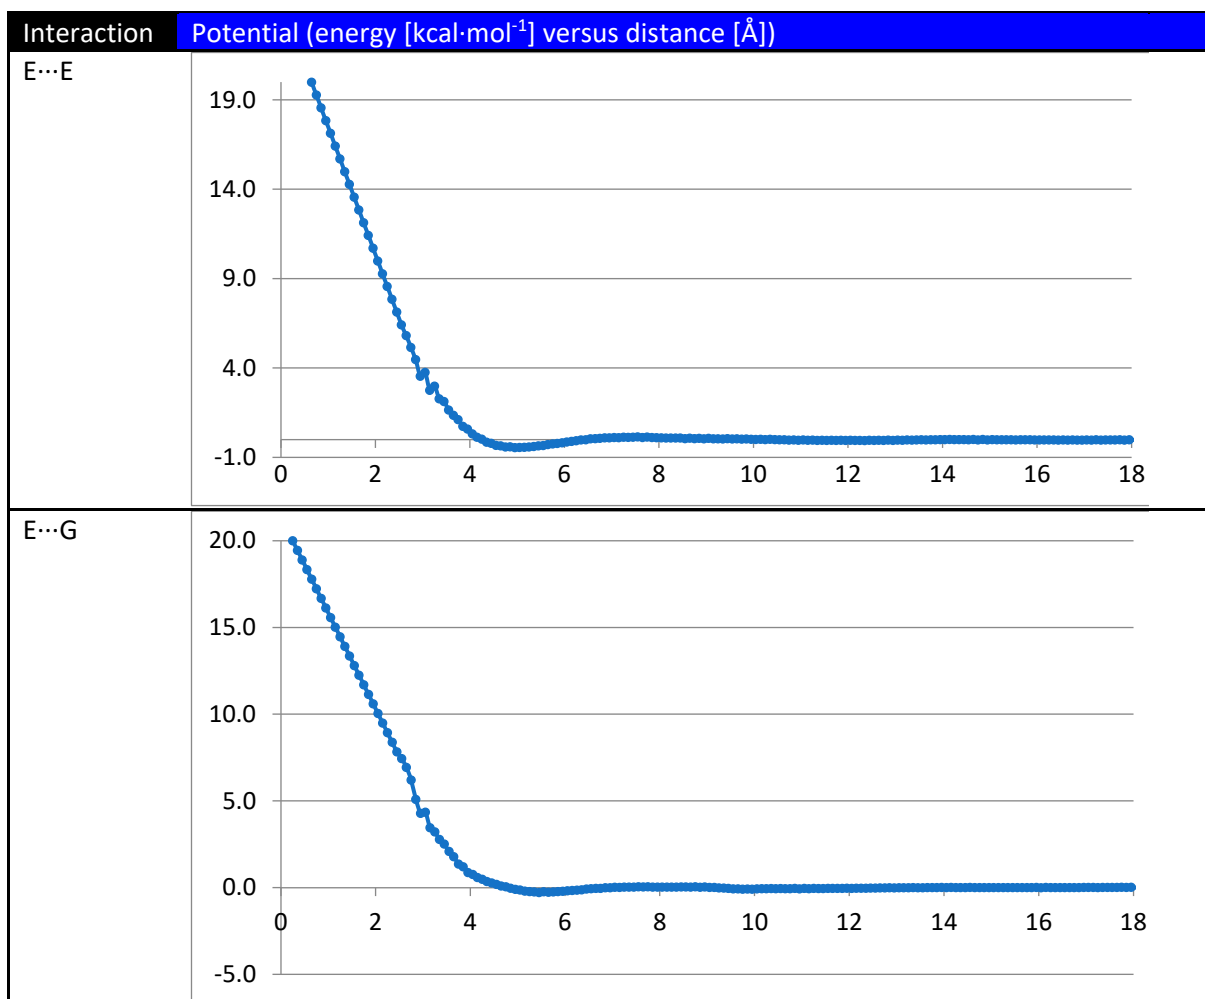

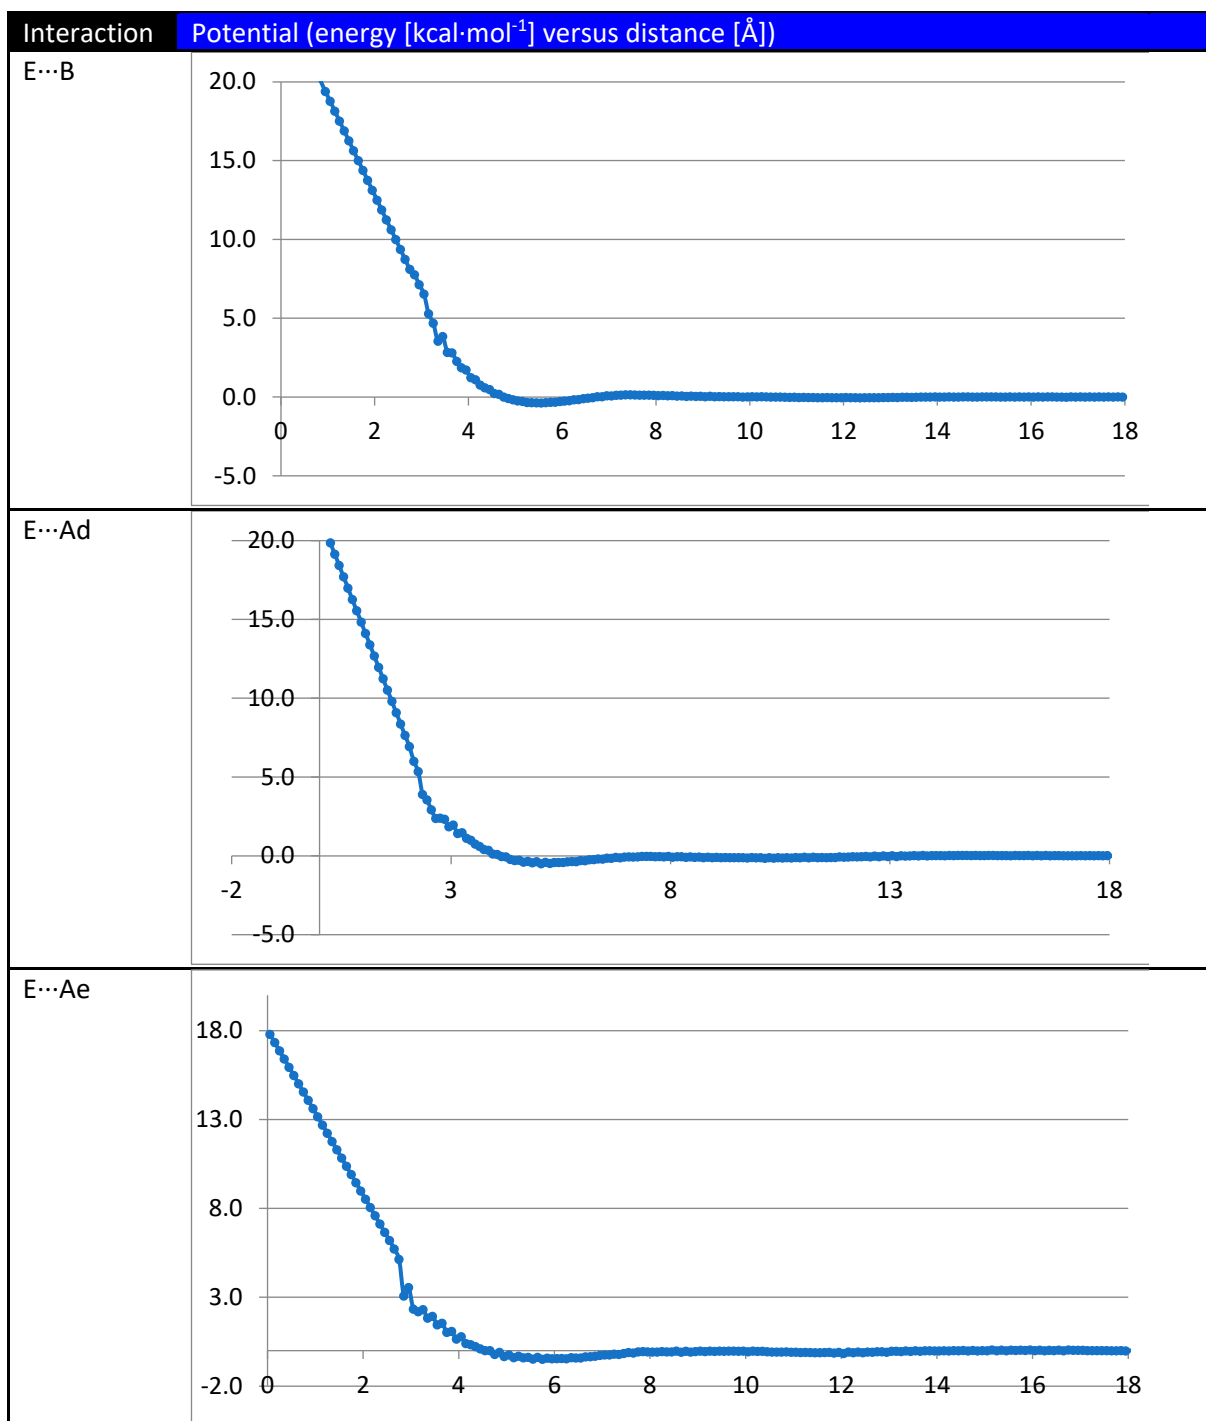

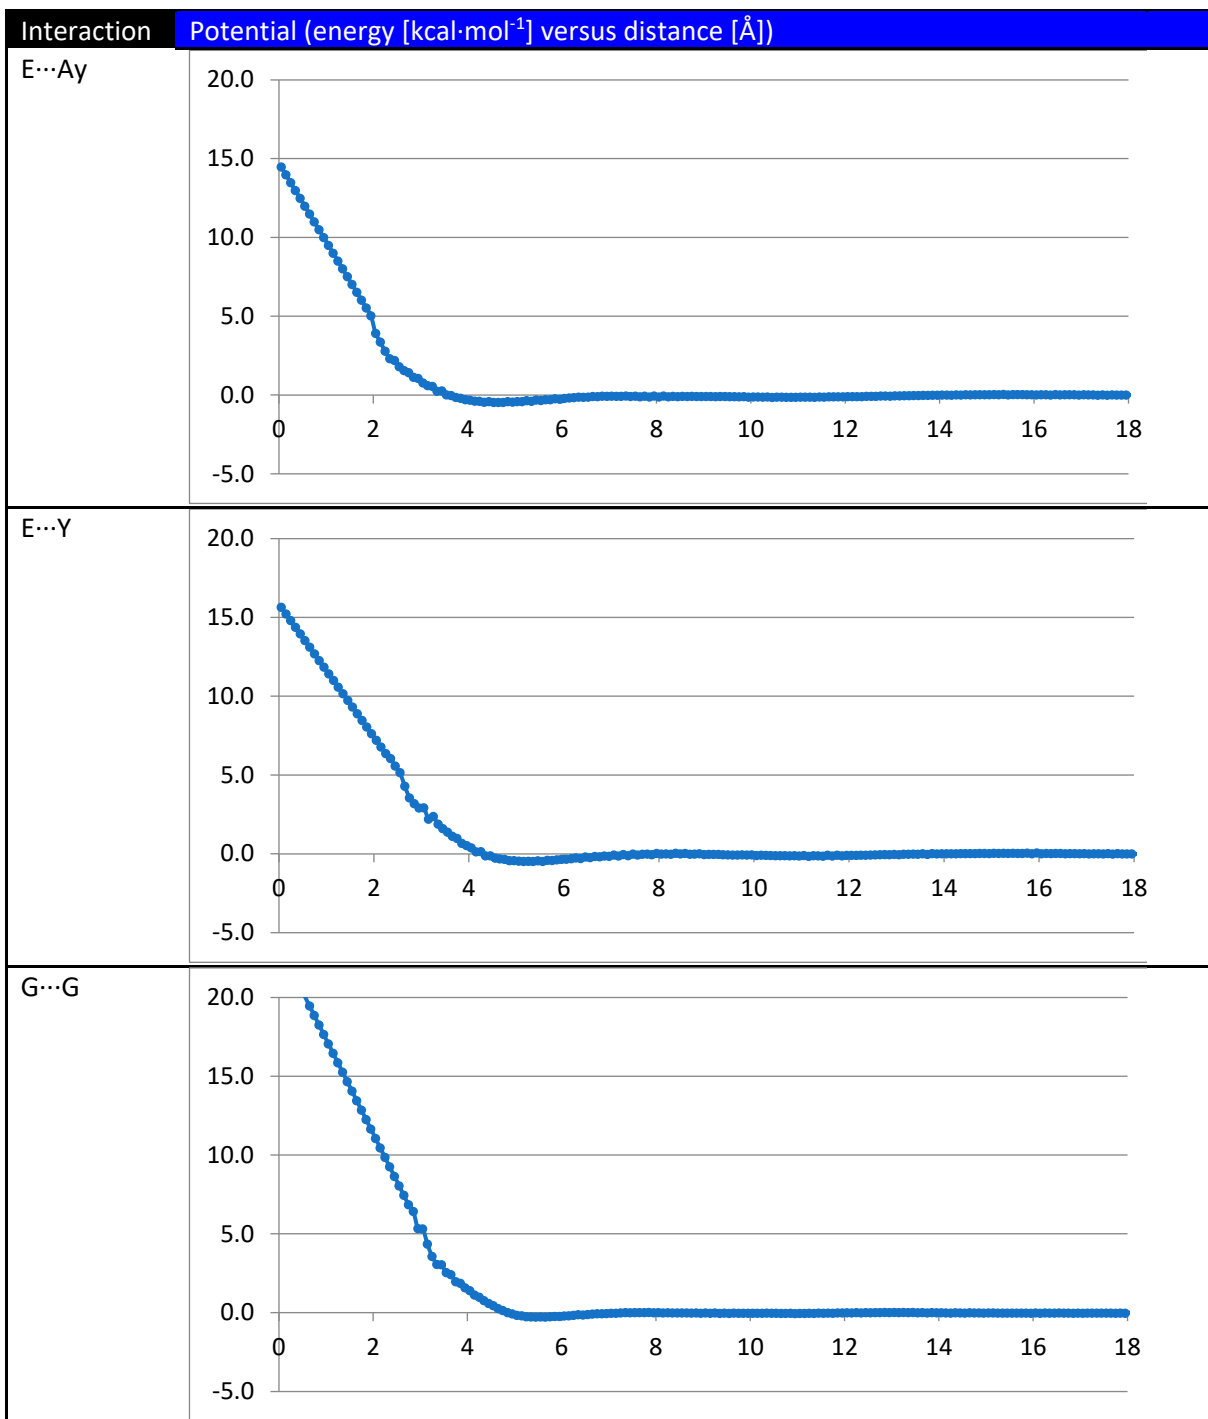

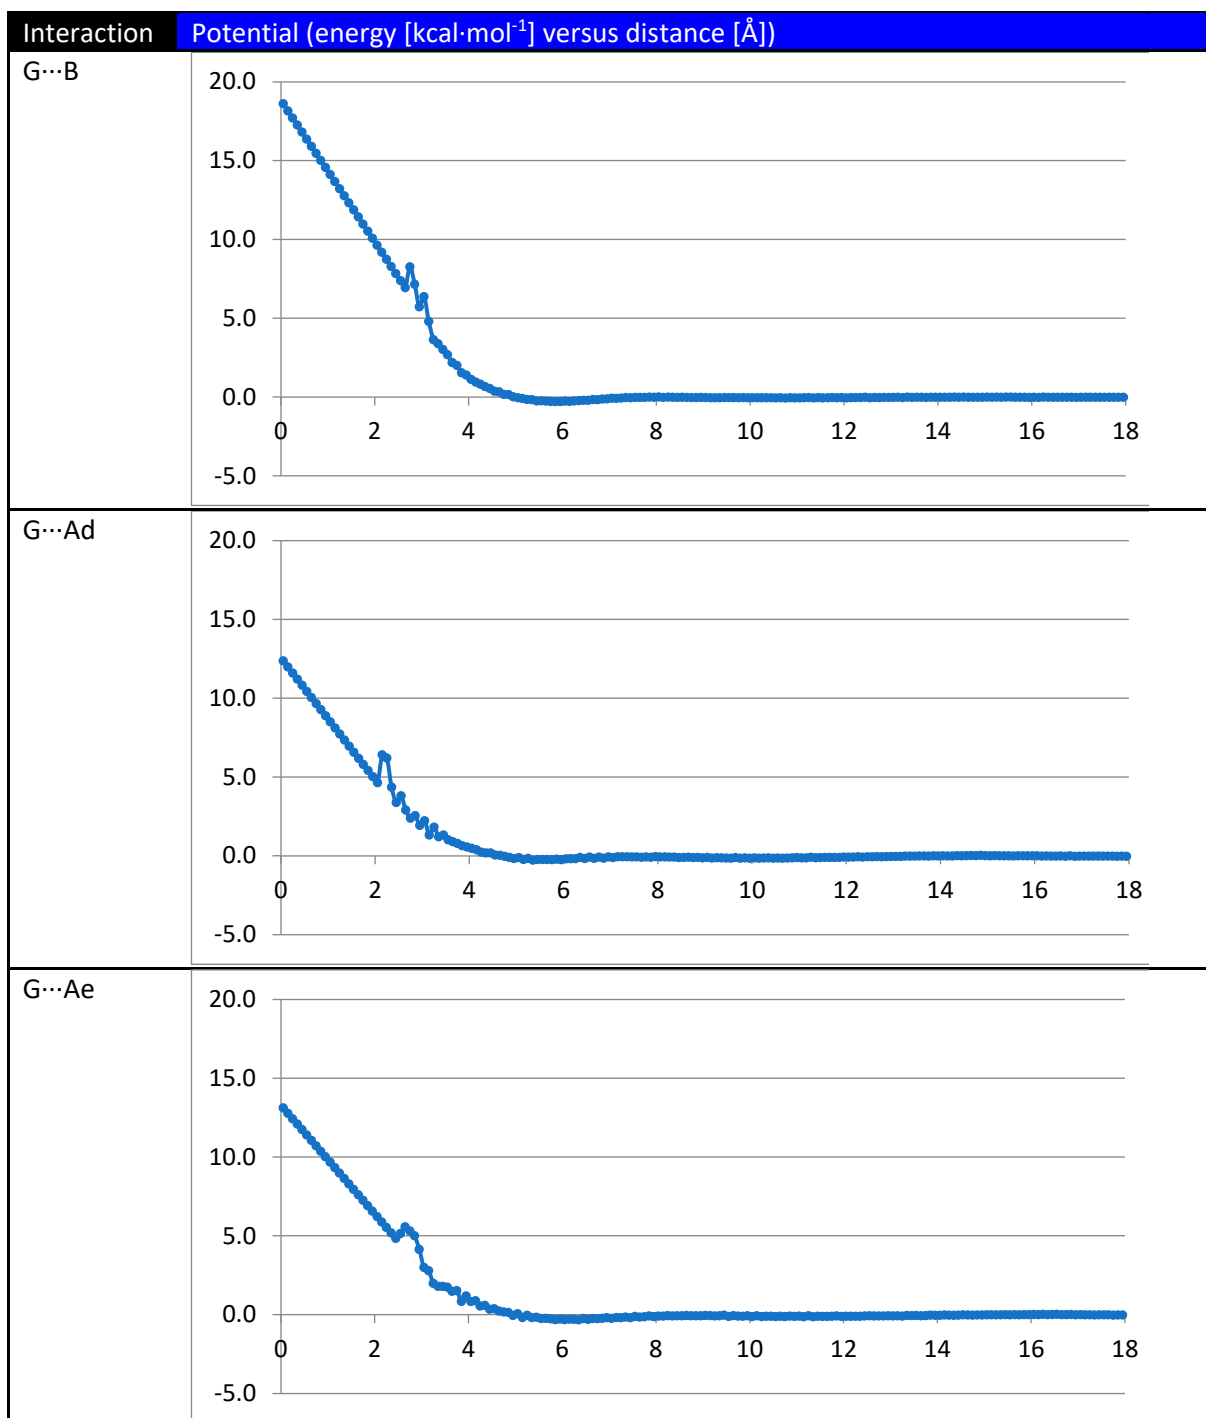

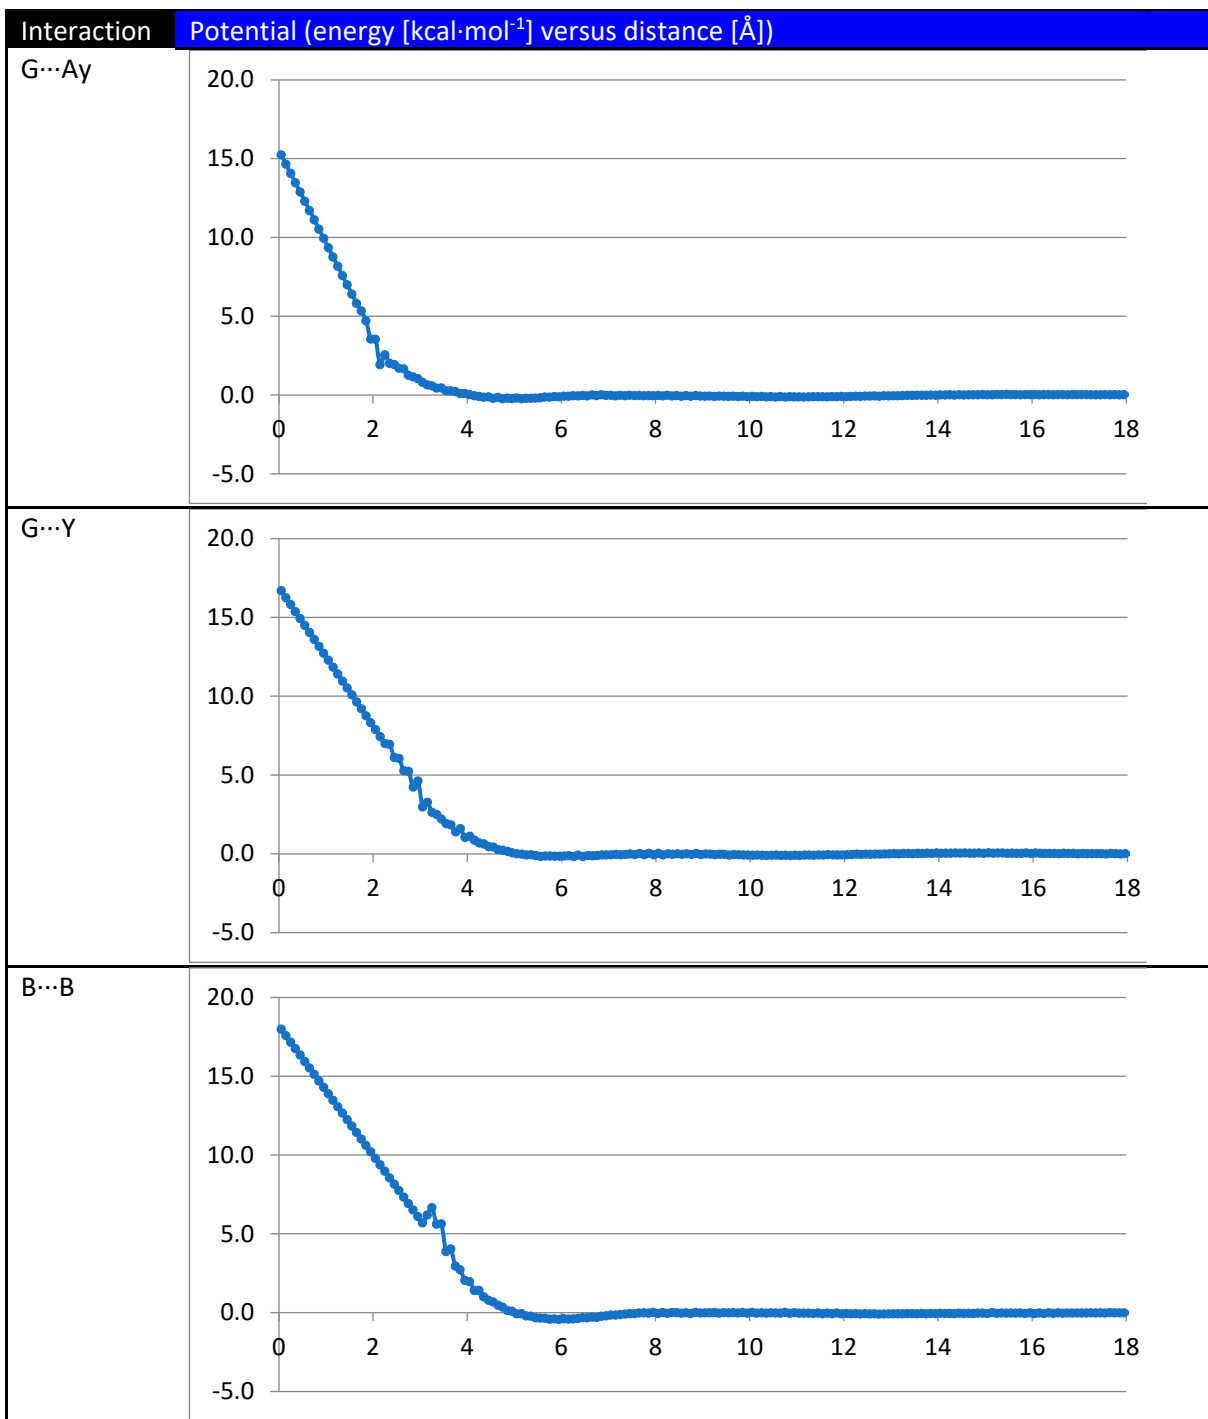



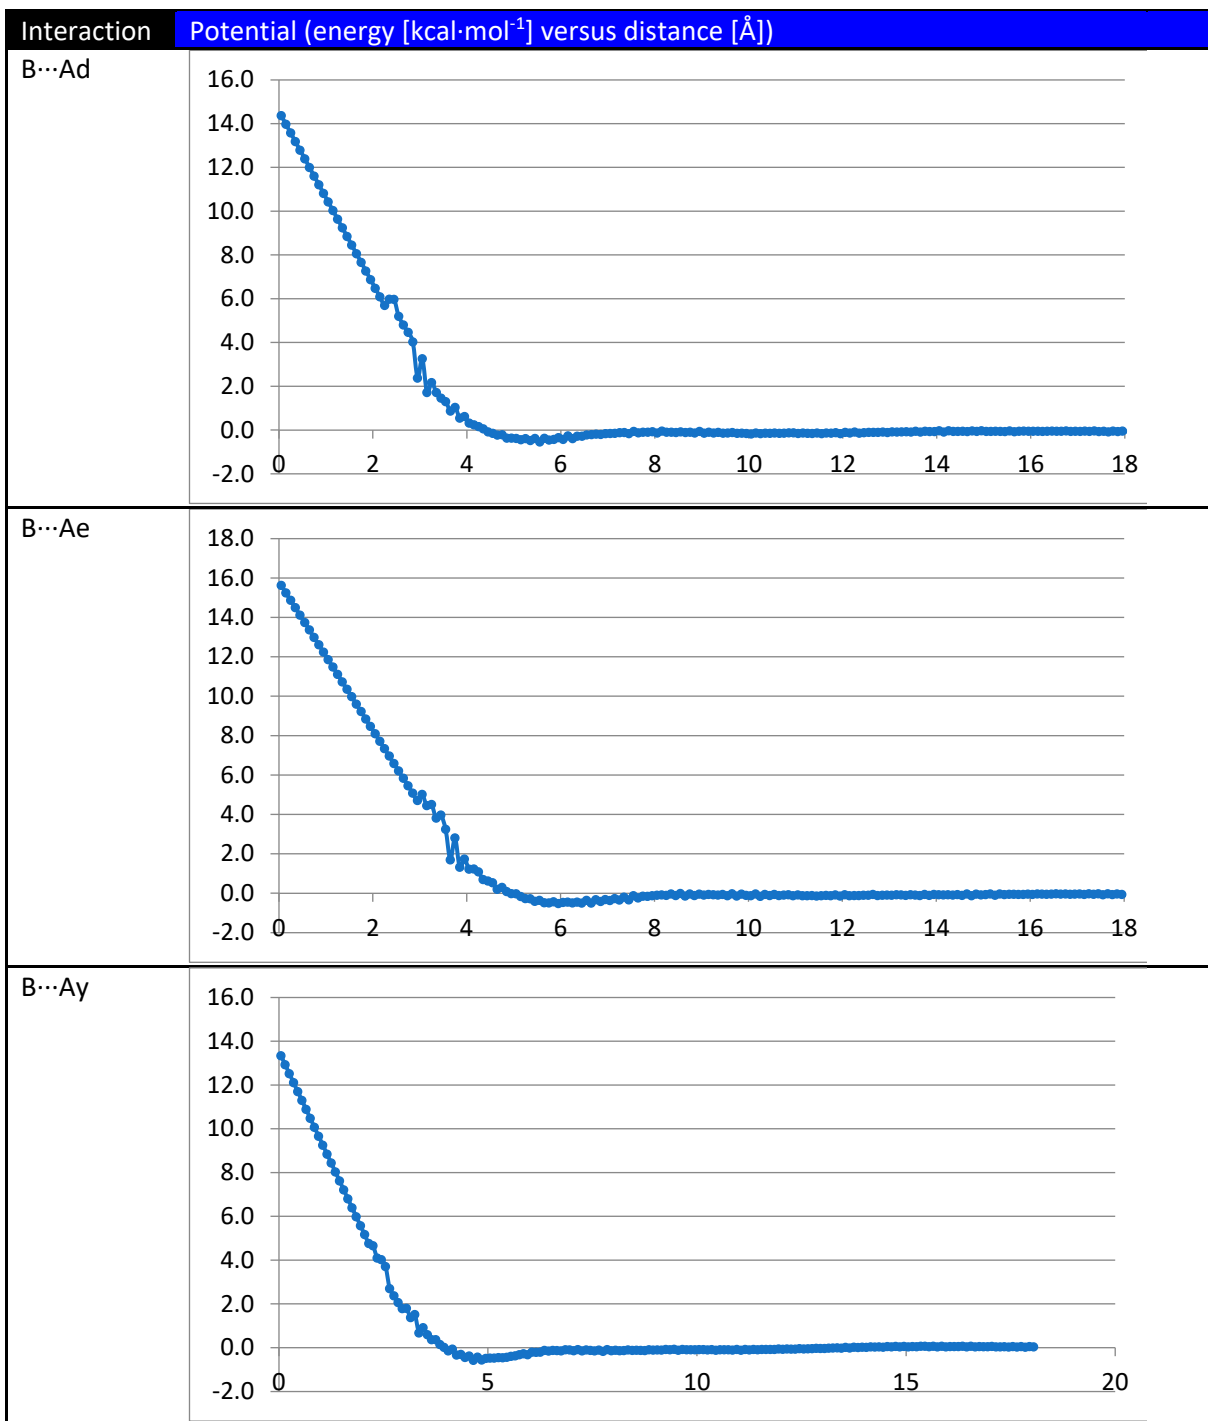

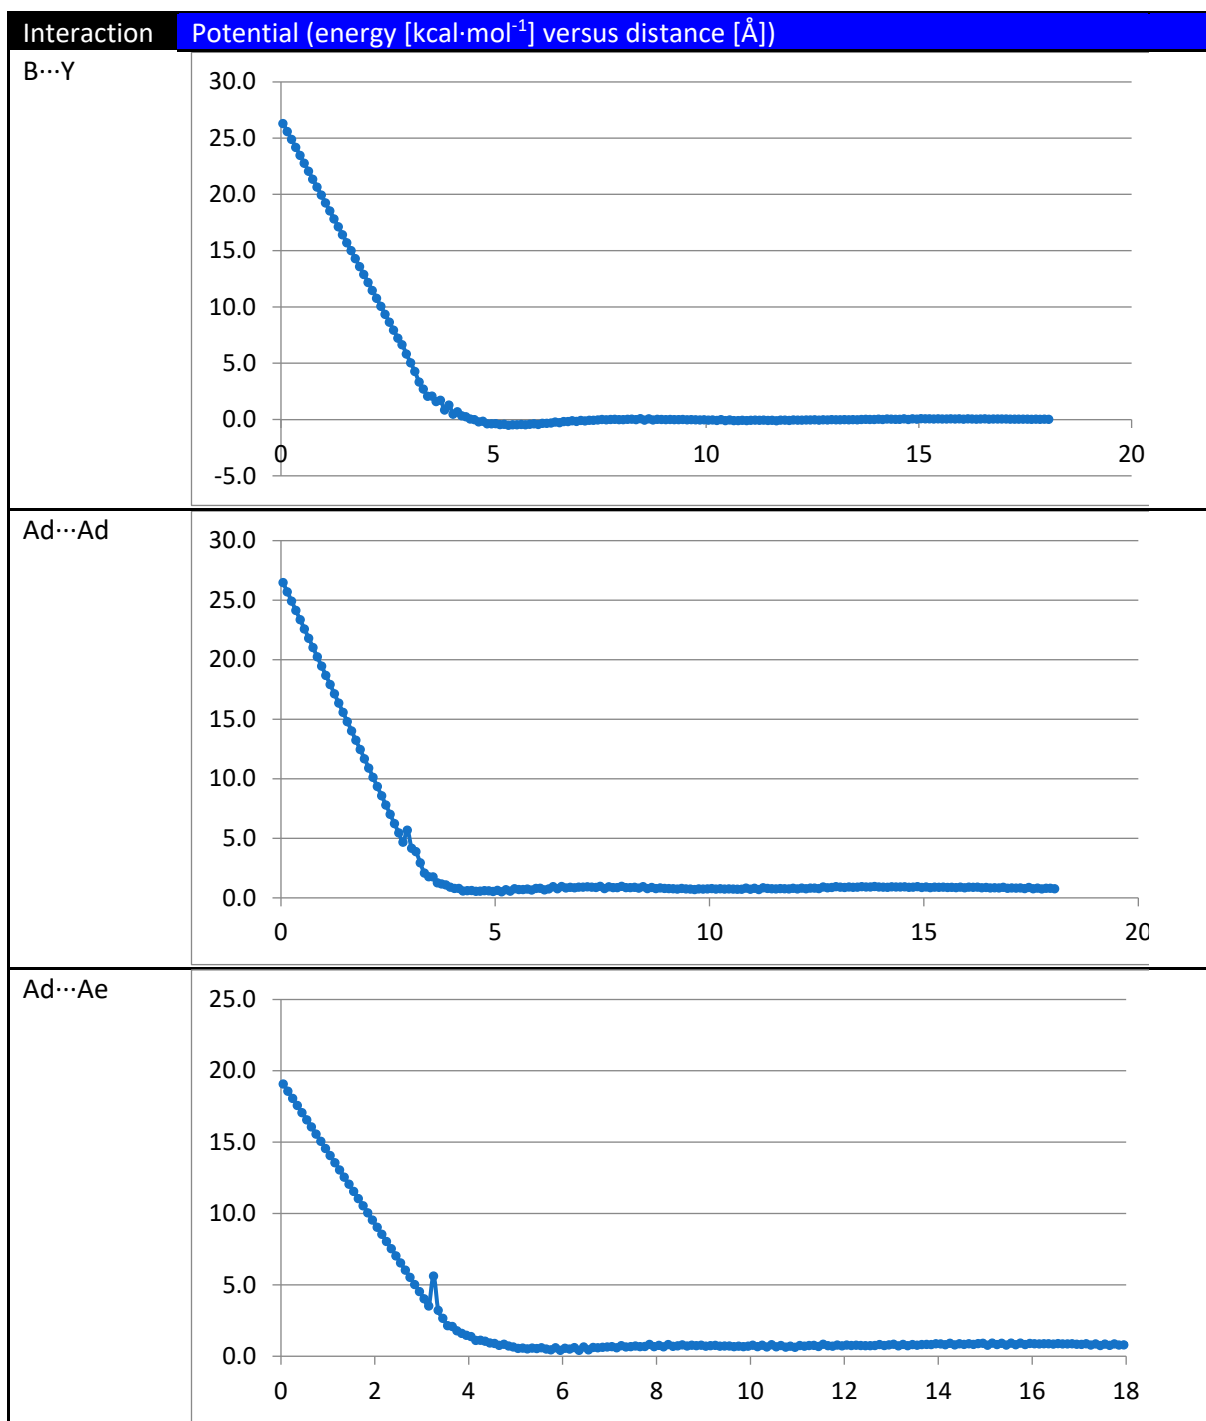

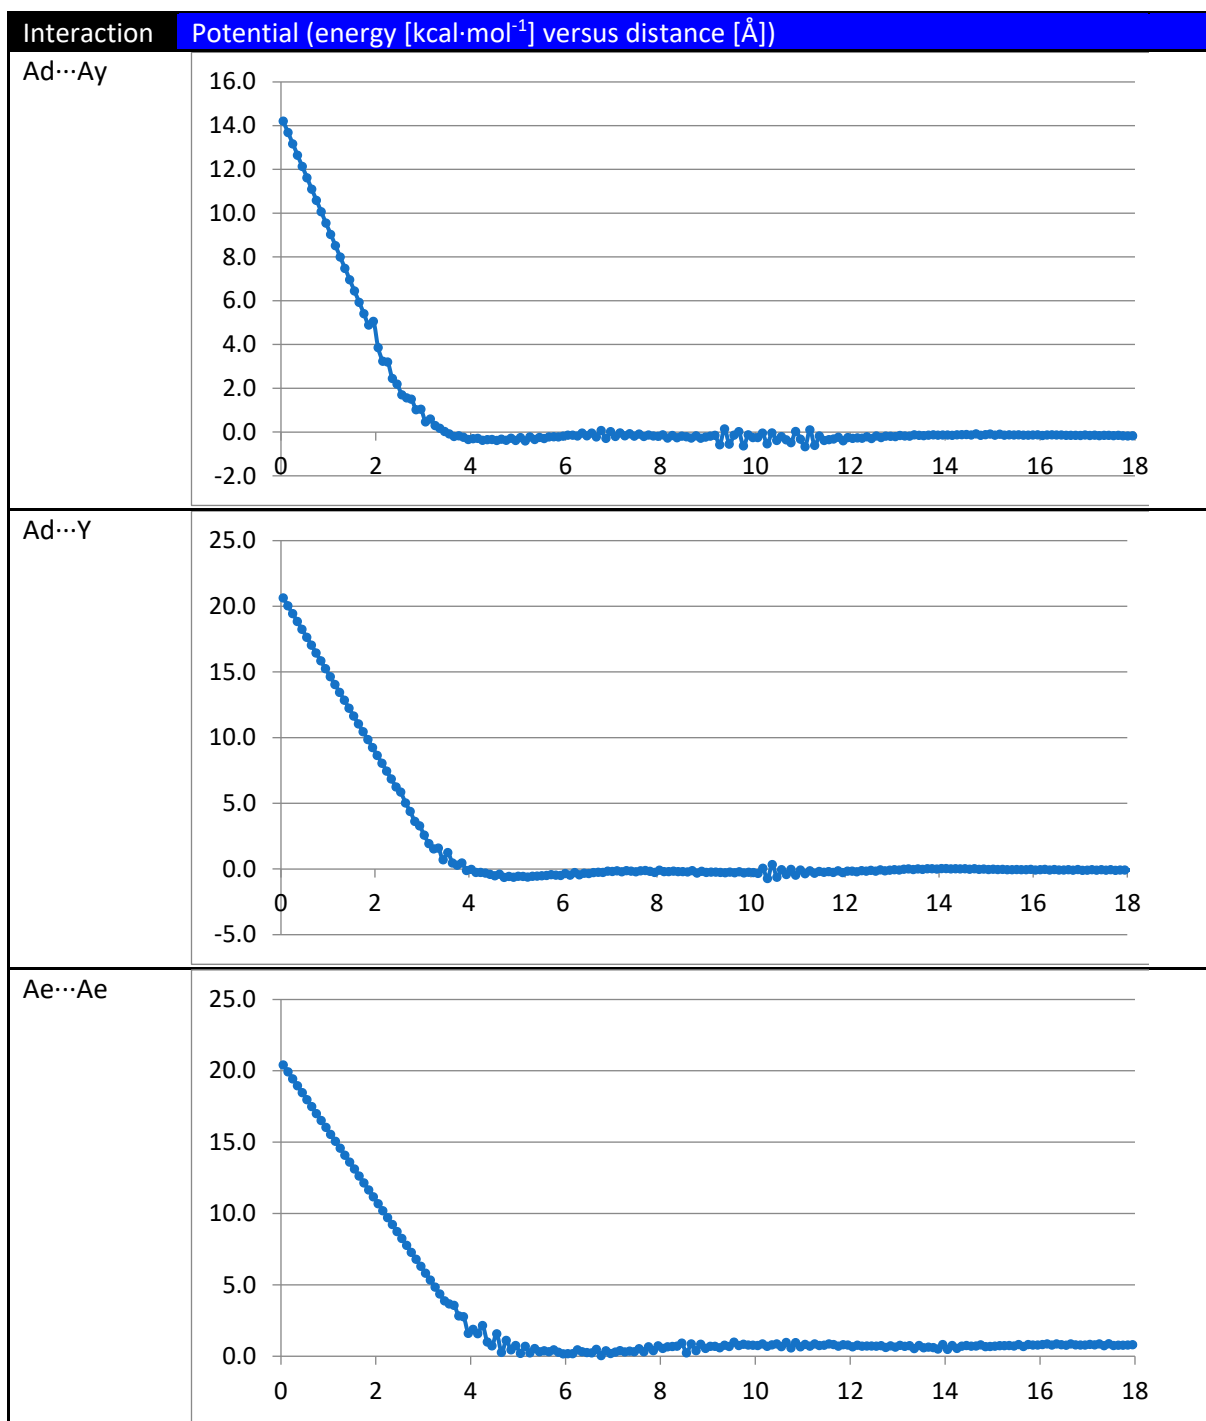

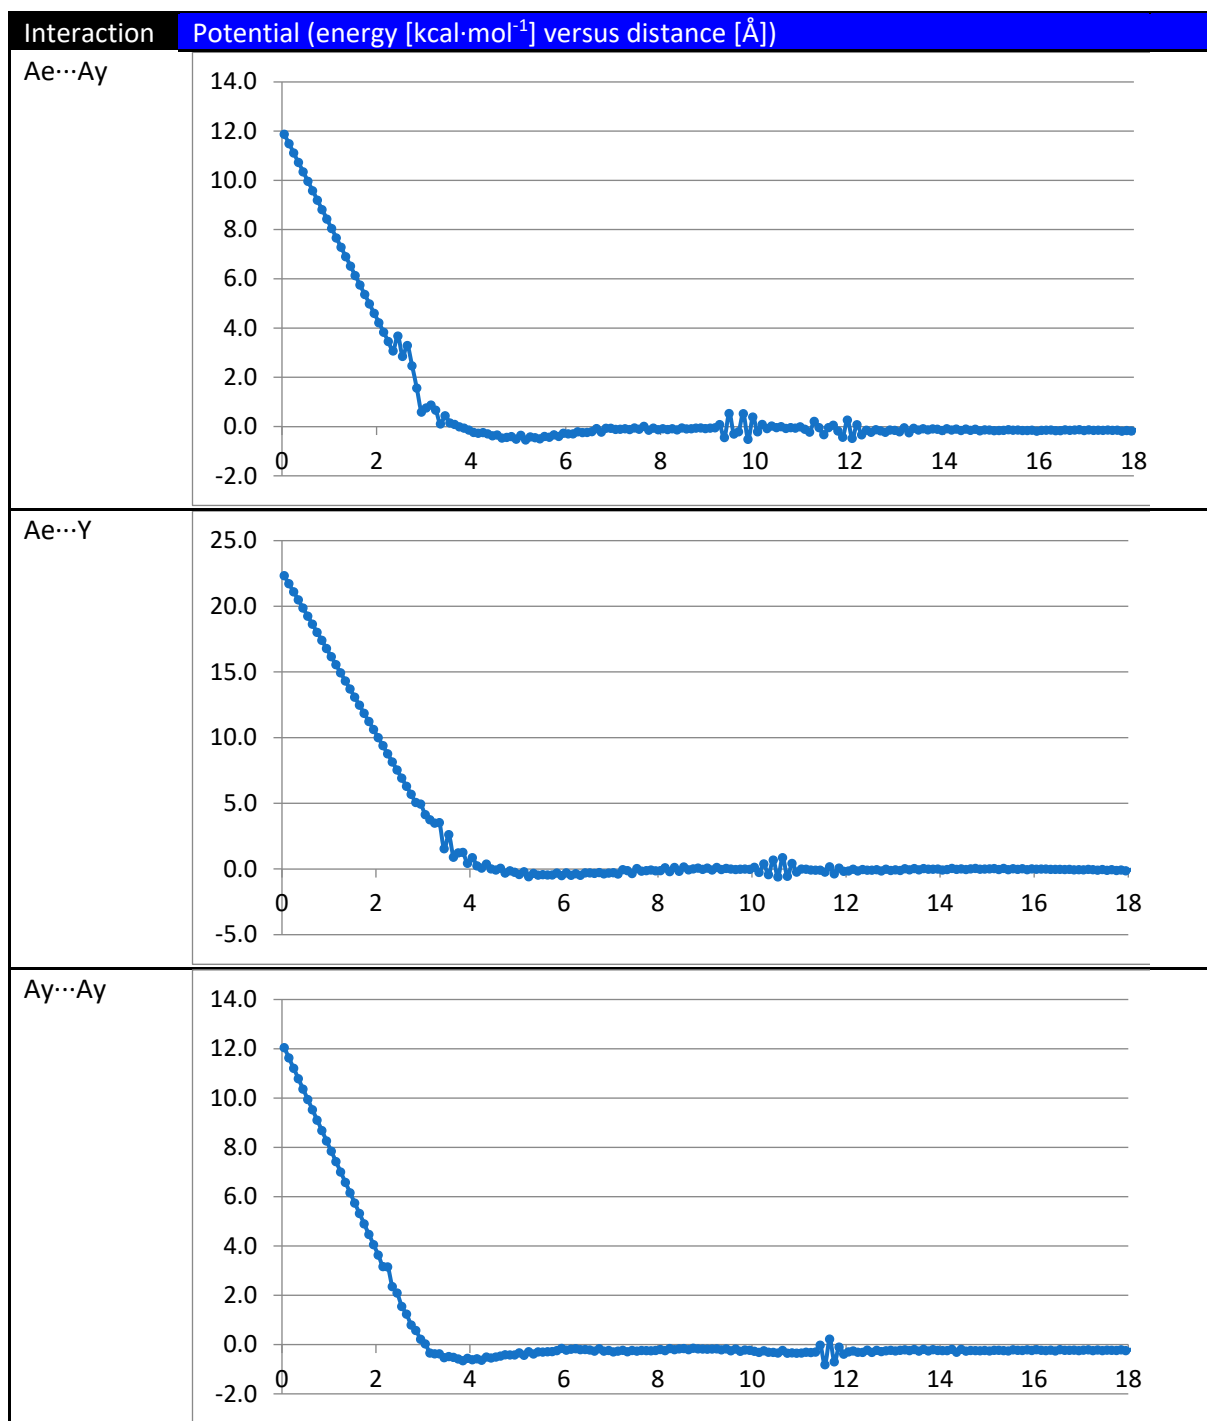

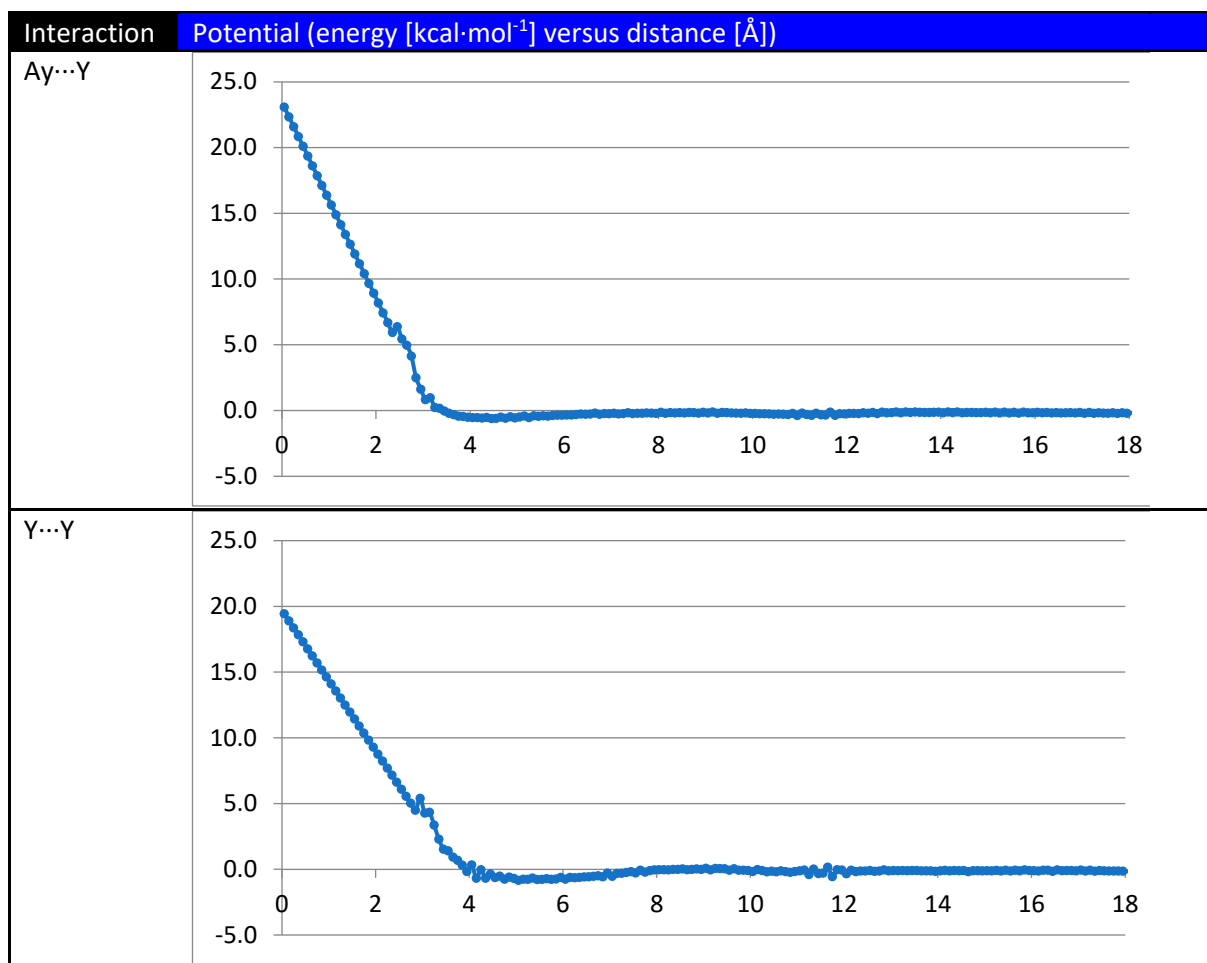

iv. Stability of developed EPO-CG force field

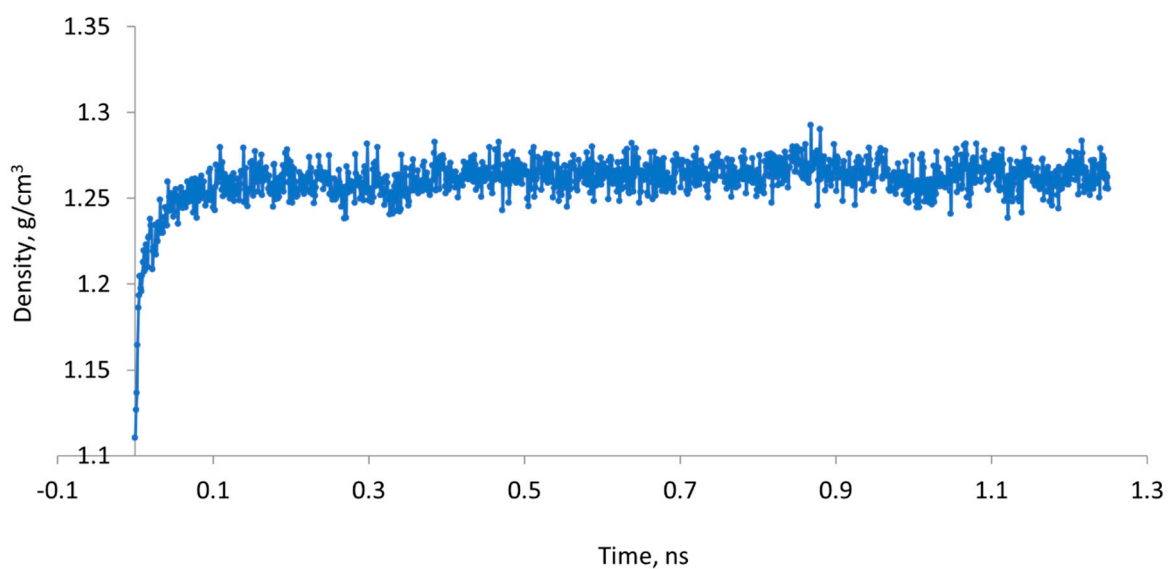

Figure S6. Density versus time in cross-linked CG epoxy system.

## Supplementary Note S4: Epoxy graphene composites CG force field (EPO-GRP-CGff)

### i. Non-bonded potentials

| Non-bonded |           |           |          |
|------------|-----------|-----------|----------|
| E ... Gr   | B ... Gr  | Ae ... Gr | Y ... Gr |
| G ... Gr   | Ad ... Gr | Ay ... Gr |          |

Table S5. List of potentials in the developed EPO-GRP-CGff forcefield for non-bonded interactions.

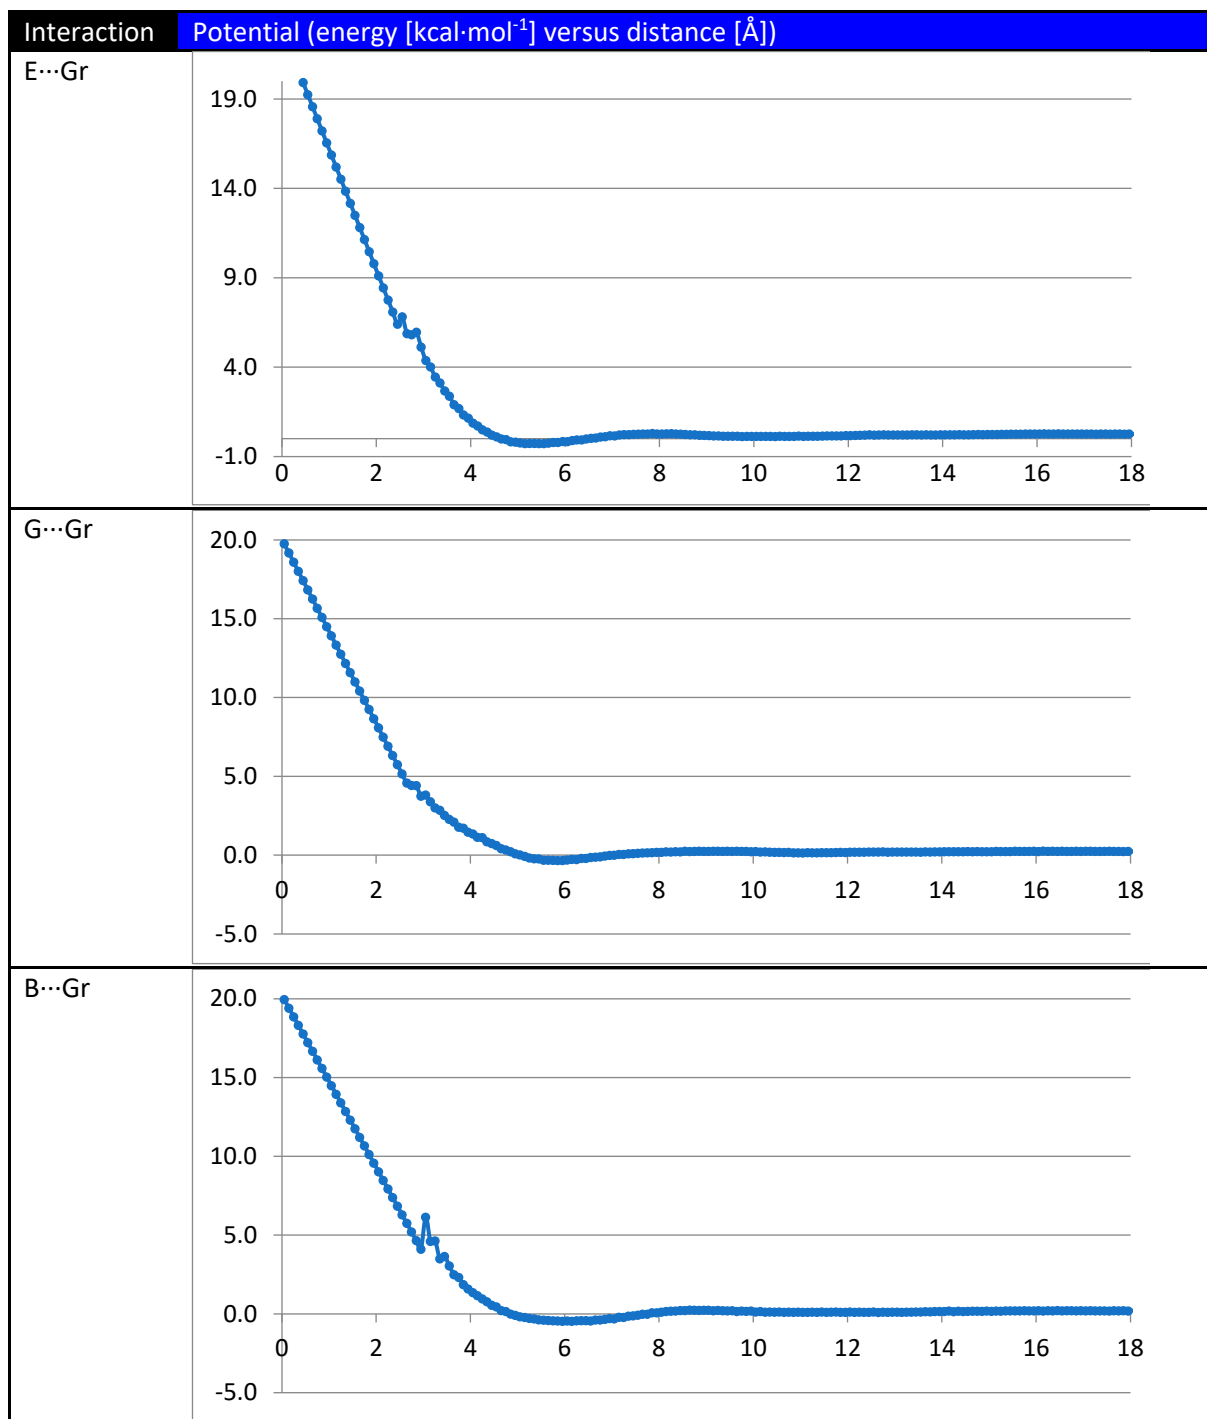

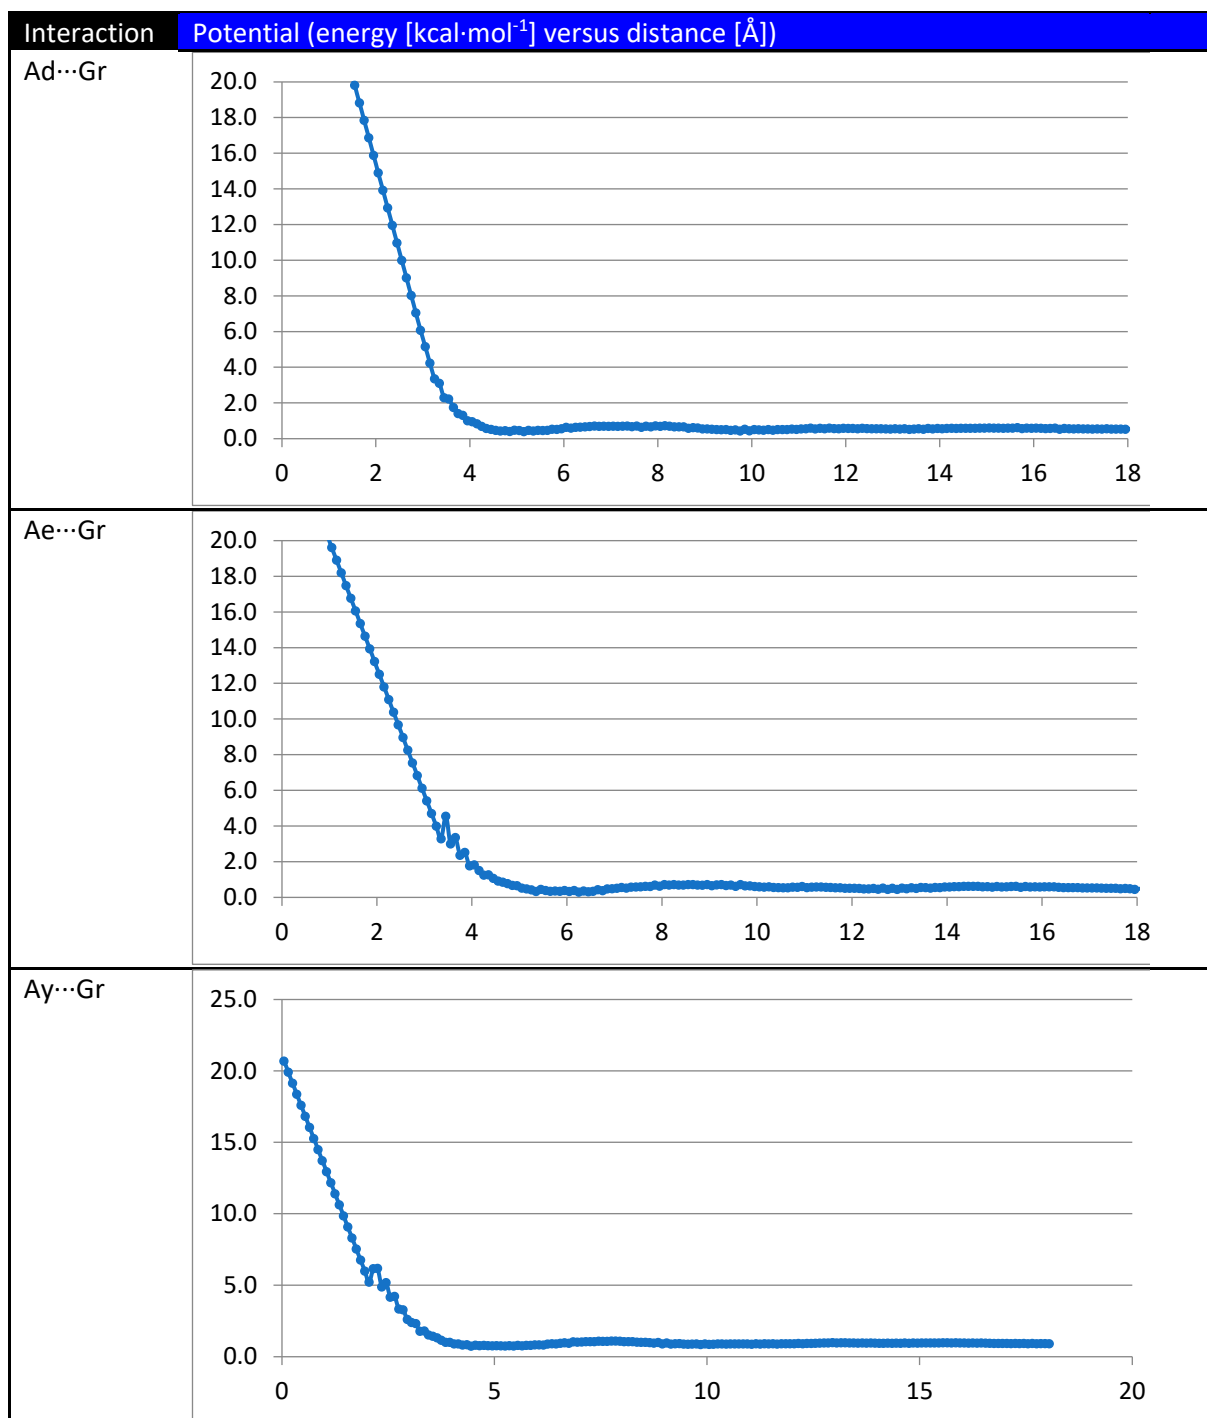

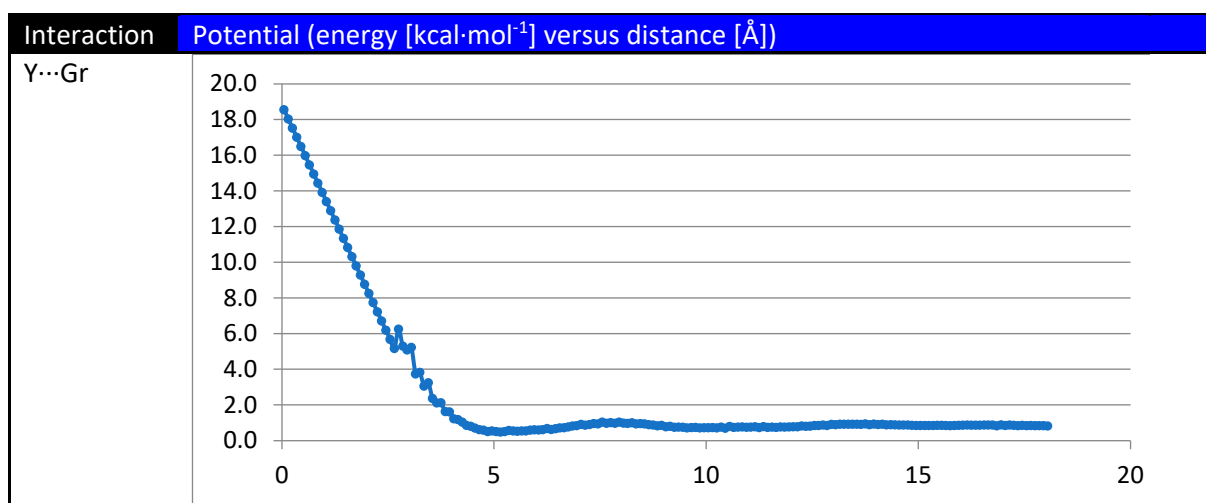

### Supplementary Note S5: Tabulated results

| Properties                       | AA MD         | CG MD         | Literature Ref          |
|----------------------------------|---------------|---------------|-------------------------|
| Density (g/cm <sup>3</sup> )     | 1.155 (0.003) | 1.24 (0.005)  | 1.07-1.20 [1]–[3]       |
| Glass transition temperature (K) | 387.87        | 390.40        | 380-390 [4]             |
| Young's modulus (GPa)            | 2.999 (0.010) | 1.419 (0.043) | 2.5-5 [1]–[3], [5]–[8]  |
| Poisson's ratio (-)              | 0.293 (0.010) | 0.335 (0.012) | 0.22-0.33 [2], [5], [7] |
| Thermal conductivity (W/m-K)     | 0.163 (0.005) | 0.099 (0.003) | 0.18-0.2 [9], [10]      |
| Specific heat capacity (kJ/kg-K) | 3.5           | 0.55          | 1.0-2.0 [11], [12]      |

Table S6. Comparison of thermophysical properties of pure epoxy resin obtained from all-atomistic, coarse-grained molecular dynamics and literature reference values.

| Properties                       | CG MD     | AA MD Ref      | Experimental Ref     |
|----------------------------------|-----------|----------------|----------------------|
| Young' modulus (GPa)             | 981-1009  | 500-1200 [13]  | 1000 [14], [15]      |
| Poisson's ratio (-)              | 0.14-0.16 | 0.14-0.39 [13] | 0.19 [16]            |
| Thermal conductivity (W/m-K)     | 520-546   | 800-1000 [17]  | 2000-5000 [18], [19] |
| Specific heat capacity (kJ/kg-K) | 0.526     | –              | 0.700 [20]           |

Table S7. Comparison of thermophysical properties of monolayer graphene sheet obtained from coarse-grained molecular dynamics and literature experimental values.

| wt.% | CG MD<br>E (GPa) | Continuum (MF)<br>E (GPa) | Continuum (FE)<br>E (GPa) |
|------|------------------|---------------------------|---------------------------|
| 0.0  | 1.419 (0.043)    | 1.419                     | 1.419 (0.043)             |
| 0.5  | 1.452 (0.046)    | 1.442                     | 1.436 (0.004)             |
| 0.8  | 1.462 (0.018)    | 1.461                     | 1.453 (0.011)             |
| 1.0  | 1.466 (0.025)    | 1.464                     | 1.459 (0.008)             |
| 1.5  | 1.496 (0.027)    | 1.497                     | 1.490 (0.000)             |
| 2.0  | 1.549 (0.036)    | 1.530                     | 1.519 (0.022)             |

Table S8. Comparison of Young's modulus obtained from coarse-grained and continuum simulations.



| wt.% | CG MD<br>Poisson's ratio (GPa) | Continuum (MF)<br>E (GPa) | Continuum (FE)<br>E (GPa) |
|------|--------------------------------|---------------------------|---------------------------|
| 0.0  | 0.335 (0.012)                  | 0.335                     | 0.335 (0.012)             |
| 0.5  | 0.321 (0.006)                  | 0.333                     | 0.333 (0.000)             |
| 0.8  | 0.319 (0.005)                  | 0.332                     | 0.332 (0.000)             |
| 1.0  | 0.318 (0.006)                  | 0.332                     | 0.332 (0.000)             |
| 1.5  | 0.312 (0.004)                  | 0.330                     | 0.331 (0.000)             |
| 2.0  | 0.306 (0.014)                  | 0.329                     | 0.330 (0.001)             |

Table S9. Comparison of Poisson's ratio obtained from coarse-grained and continuum simulations.

| wt.% | CG MD<br>$\lambda$ (W/mK) | Continuum (MF)<br>$\lambda$ (W/mK) | Continuum (FE)<br>$\lambda$ (W/mK) |
|------|---------------------------|------------------------------------|------------------------------------|
| 0.0  | 0.099 (0.003)             | 0.099                              | 0.099 (0.003)                      |
| 0.5  | 0.104 (0.003)             | 0.108                              | 0.107 (0.000)                      |
| 0.8  | 0.114 (0.002)             | 0.111                              | 0.109 (0.001)                      |
| 1.0  | 0.116 (0.001)             | 0.113                              | 0.111 (0.001)                      |
| 1.5  | 0.118 (0.001)             | 0.118                              | 0.115 (0.000)                      |
| 2.0  | 0.120 (0.002)             | 0.123                              | 0.120 (0.001)                      |

Table S10. Comparison of thermal conductivity obtained from coarse-grained and continuum simulations.

## References

- [1] C. Liu, W. Ning, L. Tam, and Z. Yu, "Understanding fracture behavior of epoxy-based polymer using molecular dynamics simulation," *J Mol Graph Model*, vol. 101, p. 107757, Dec. 2020, doi: 10.1016/j.jmgm.2020.107757.
- [2] R. Feng and R. J. Farris, "The characterization of thermal and elastic constants for an epoxy photoresist SU8 coating," *J Mater Sci*, vol. 37, no. 22, pp. 4793–4799, 2002, doi: 10.1023/A:1020862129948.
- [3] H. Yu, O. Balogun, B. Li, T. W. Murray, and X. Zhang, "Building embedded microchannels using a single layered SU-8, and determining Young's modulus using a laser acoustic technique," *Journal of Micromechanics and Microengineering*, vol. 14, no. 11, pp. 1576–1584, Nov. 2004, doi: 10.1088/0960-1317/14/11/020.
- [4] A. Gavrielides, T. Duguet, M. Aufray, and C. Lacaze-Dufaure, "Model of the DGEBA-EDA Epoxy Polymer: Experiments and Simulation Using Classical Molecular Dynamics," *Int J Polym Sci*, vol. 2019, pp. 1–9, Feb. 2019, doi: 10.1155/2019/9604714.
- [5] A. T. Al-Halhouli, I. Kampen, T. Krah, and S. Büttgenbach, "Nanoindentation testing of SU-8 photoresist mechanical properties," *Microelectron Eng*, vol. 85, no. 5–6, pp. 942–944, May 2008, doi: 10.1016/j.mee.2008.01.033.
- [6] H. Lorenz, M. Laudon, and P. Renaud, "Mechanical characterization of a new high-aspect-ratio near UV-photoresist," *Microelectron Eng*, vol. 41–42, pp. 371–374, Mar. 1998, doi: 10.1016/S0167-9317(98)00086-0.

- [7] F. E. H. Tay, J. A. van Kan, F. Watt, and W. O. Choong, "A novel micro-machining method for the fabrication of thick-film SU-8 embedded micro-channels," *Journal of Micromechanics and Microengineering*, vol. 11, no. 1, pp. 27–32, Jan. 2001, doi: 10.1088/0960-1317/11/1/305.
- [8] J. Hammacher, A. Fuelle, J. Flaemig, J. Saupe, B. Loechel, and J. Grimm, "Stress engineering and mechanical properties of SU-8-layers for mechanical applications," *Microsystem Technologies*, vol. 14, no. 9–11, pp. 1515–1523, Oct. 2008, doi: 10.1007/s00542-007-0534-7.
- [9] Z. Wang *et al.*, "Dielectric properties and thermal conductivity of epoxy composites using core/shell structured Si/SiO<sub>2</sub>/Polydopamine," *Compos B Eng*, vol. 140, pp. 83–90, May 2018, doi: 10.1016/j.compositesb.2017.12.004.
- [10] J. Ren *et al.*, "Enhanced thermal conductivity of epoxy composites by introducing graphene@boron nitride nanosheets hybrid nanoparticles," *Mater Des*, vol. 191, p. 108663, Jun. 2020, doi: 10.1016/j.matdes.2020.108663.
- [11] A. C. Ackermann, M. Fischer, A. Wick, S. Carosella, B. L. Fox, and P. Middendorf, "Mechanical, Thermal and Electrical Properties of Epoxy Nanocomposites with Amine-Functionalized Reduced Graphene Oxide via Plasma Treatment," *Journal of Composites Science*, vol. 6, no. 6, p. 153, May 2022, doi: 10.3390/jcs6060153.
- [12] X. Wang, Q. Wang, L. Gao, and Y. Jia, "Effects of key thermophysical properties on the curing uniformity of carbon fiber reinforced resin composites," *e-Polymers*, vol. 18, no. 1, pp. 19–26, Jan. 2018, doi: 10.1515/epoly-2017-0104.
- [13] S. Thomas, K. M. Ajith, S. U. Lee, and M. C. Valsakumar, "Assessment of the mechanical properties of monolayer graphene using the energy and strain-fluctuation methods," *RSC Adv*, vol. 8, no. 48, pp. 27283–27292, 2018, doi: 10.1039/C8RA02967A.
- [14] C. Lee, X. Wei, J. W. Kysar, and J. Hone, "Measurement of the Elastic Properties and Intrinsic Strength of Monolayer Graphene," *Science (1979)*, vol. 321, no. 5887, pp. 385–388, Jul. 2008, doi: 10.1126/science.1157996.
- [15] Q. Cao *et al.*, "A Review of Current Development of Graphene Mechanics," *Crystals (Basel)*, vol. 8, no. 9, p. 357, Sep. 2018, doi: 10.3390/cryst8090357.
- [16] A. Politano and G. Chiarello, "Probing the Young's modulus and Poisson's ratio in graphene/metal interfaces and graphite: a comparative study," *Nano Res*, vol. 8, no. 6, pp. 1847–1856, Jun. 2015, doi: 10.1007/s12274-014-0691-9.
- [17] L. Wang and H. Sun, "Thermal conductivity of silicon and carbon hybrid monolayers: a molecular dynamics study," *J Mol Model*, vol. 18, no. 11, pp. 4811–4818, Nov. 2012, doi: 10.1007/s00894-012-1482-4.
- [18] A. A. Balandin, "Thermal properties of graphene and nanostructured carbon materials," *Nat Mater*, vol. 10, no. 8, pp. 569–581, Aug. 2011, doi: 10.1038/nmat3064.
- [19] S. Chen *et al.*, "Thermal conductivity of isotopically modified graphene," *Nat Mater*, vol. 11, no. 3, pp. 203–207, Mar. 2012, doi: 10.1038/nmat3207.
- [20] Q.-Y. Li *et al.*, "Measurement of specific heat and thermal conductivity of supported and suspended graphene by a comprehensive Raman optothermal method," *Nanoscale*, vol. 9, no. 30, pp. 10784–10793, 2017, doi: 10.1039/C7NR01695F.
